# Supplementary material for: 27 T ultra-high static magnetic field changes orientation and morphology of mitotic spindles in human cells
Source: eLife. 2017 Feb 28;6:e22911. doi: 10.7554/eLife.22911 (PMC5370190; doi:10.7554/eLife.22911)
Supplement: Figure 2—source data 1. — This is the source data for Figure 2B. DOI: http://dx.doi.org/10.7554/eLife.22911.006 [file elife-22911-fig2-data1.xlsx]

## Sheet: Figure 2B
CNE-2Z +27 T/4 h		Control	Sham	27 T
Relative cell number	NO 1	1	0.784055	1.05581
	NO 2	1	0.987462	0.834414
	NO 3	1	1.14324	1.1165
	Average	1	0.971587	1.00224
	SD	0	0.180119	0.148474
