# Supplementary material for: 27 T ultra-high static magnetic field changes orientation and morphology of mitotic spindles in human cells
Source: eLife. 2017 Feb 28;6:e22911. doi: 10.7554/eLife.22911 (PMC5370190; doi:10.7554/eLife.22911)
Supplement: Figure 3—source data 1. — This is the source data for Figure 3C. DOI: http://dx.doi.org/10.7554/eLife.22911.009 [file elife-22911-fig3-data1.xlsx]

## Sheet: Figure 3C
	CNE-2Z +4 h
	Control (%)			Sham (%)			27 T (%)
	Lateral	Non-lateral		Lateral	Non-lateral		Lateral	Non-lateral
NO 1	83.6364	16.3636		83.3333	16.6667		70.9091	29.0909
NO 2	82.0755	17.9245		84.7619	15.2381		72	28
NO 3	79	21		80.6452	19.3548		75	25
NO 4	85	15		85.7143	14.2857		75.4098	24.5902
Average	82.428	17.572		83.6137	16.3863		73.3297	26.6703
SD	2.57881	2.57881		2.20769	2.20769		2.21693	2.21693
