# Supplementary material for: 27 T ultra-high static magnetic field changes orientation and morphology of mitotic spindles in human cells
Source: eLife. 2017 Feb 28;6:e22911. doi: 10.7554/eLife.22911 (PMC5370190; doi:10.7554/eLife.22911)
Supplement: Figure 4—source data 1. — This is the source data for Figure 4B. DOI: http://dx.doi.org/10.7554/eLife.22911.012 [file elife-22911-fig4-data1.xlsx]

## Sheet: Figure 4B
	CNE-2Z +4 h
	Control (%)			0.05 T (%)			1 T (%)
	Lateral	Non-lateral		Lateral	Non-lateral		Lateral	Non-lateral
NO 1	89.8285	10.1715		89.7275	10.2725		94.3803	5.6197
NO 2	95.9	4.1		96.85	3.15		98.45	1.55
NO 3	92	8		91	9		90	10
Average	92.5762	7.42383		92.5258	7.47417		94.2768	5.72323
SD	3.07648	3.07648		3.7985	3.7985		4.22595	4.22595
