# Supplementary material for: 27 T ultra-high static magnetic field changes orientation and morphology of mitotic spindles in human cells
Source: eLife. 2017 Feb 28;6:e22911. doi: 10.7554/eLife.22911 (PMC5370190; doi:10.7554/eLife.22911)
Supplement: Figure 4—source data 2. — This is the source data for Figure 4C. DOI: http://dx.doi.org/10.7554/eLife.22911.013 [file elife-22911-fig4-data2.xlsx]

## Sheet: Figure 4C
	CNE-2Z +4 h
	Control (%)			9 T (%)
	Lateral	Non-lateral		Lateral	Non-lateral
NO 1	85	15		82	18
NO 2	89	11		83	17
Average	87	13		82.5	17.5
SD	2.82843	2.82843		0.707107	0.707107
