# Supplementary material for: 27 T ultra-high static magnetic field changes orientation and morphology of mitotic spindles in human cells
Source: eLife. 2017 Feb 28;6:e22911. doi: 10.7554/eLife.22911 (PMC5370190; doi:10.7554/eLife.22911)
Supplement: Figure 4—source data 3. — This is the source data for Figure 4D. DOI: http://dx.doi.org/10.7554/eLife.22911.014 [file elife-22911-fig4-data3.xlsx]

## Sheet: Figure 4D
	CNE-2Z +3 d
	Control (%)			0.05 T (%)			1 T (%)
	Lateral	Non-lateral		Lateral	Non-lateral		Lateral	Non-lateral
NO 1	91	9		88	12		90	10
NO 2	88.9	11.1		90.35	9.65		90.1	9.9
Average	89.95	10.05		89.175	10.825		90.05	9.95
SD	1.48492	1.48492		1.6617	1.6617		0.0707107	0.0707107
