# Supplementary material for: 27 T ultra-high static magnetic field changes orientation and morphology of mitotic spindles in human cells
Source: eLife. 2017 Feb 28;6:e22911. doi: 10.7554/eLife.22911 (PMC5370190; doi:10.7554/eLife.22911)
Supplement: Figure 4—source data 5. — This is the source data for Figure 4F. DOI: http://dx.doi.org/10.7554/eLife.22911.016 [file elife-22911-fig4-data5.xlsx]

## Sheet: Figure 4F
	CNE-2Z +7 d
	Control (%)			0.05 T (%)			1 T (%)
	Lateral	Non-lateral		Lateral	Non-lateral		Lateral	Non-lateral
NO 1	93	7		94	6		91	9
NO 2	92.7	7.3		93.1	6.9		94.6	5.4
Average	92.85	7.15		93.55	6.45		92.8	7.2
SD	0.212132	0.212132		0.636396	0.636396		2.54558	2.54558
