# Supplementary material for: 27 T ultra-high static magnetic field changes orientation and morphology of mitotic spindles in human cells
Source: eLife. 2017 Feb 28;6:e22911. doi: 10.7554/eLife.22911 (PMC5370190; doi:10.7554/eLife.22911)
Supplement: Figure 5—source data 1. — This is the source data for Figure 5F. DOI: http://dx.doi.org/10.7554/eLife.22911.018 [file elife-22911-fig5-data1.xlsx]

## Sheet: Figure 5F
	CNE-2Z												Prometaphase (°)		Metaphase (°)
	Prometaphase (%)												Control	27 T	Control	27 T
	Control				Sham				27 T				0	0	0	0
	Parallel	Others	Normal		Parallel	Others	Normal		Parallel	Others	Normal		3.9	0	0	0
NO 1	23.5	43.1	33.4		36.4	38.6	25		49.5	28	22.6		5.3	0	3.68	5.08
NO 2	26.2	30.9	42.9		32	28	40		52.9	26.5	20.6		6.33	6.94	5.04	5.45
Average	24.85	37	38.15		34.2	33.3	32.5		51.2	27.25	21.6		9.17	7.88	5.51	8
SD	1.90919	8.6267	6.71751		3.11127	7.49533	10.6066		2.40416	1.06066	1.41421		12.31	9.4	6.51	8.47
													13.31	10.36	7.1	10.11
	Metaphase (%)												15.52	10.48	8.08	10.2
	Control				Sham				27 T				16.9	10.73	8.22	13.45
	Parallel	Others	Normal		Parallel	Others	Normal		Parallel	Others	Normal		19.56	12.48	9.73	14.5
NO 1	33.3	39.3	27.4		49.1	26.4	24.5		15.7	29.7	54.6		22.13	13.46	10.21	16.53
NO 2	36.7	31.6	31.7		36.6	39.4	24		27.3	23.3	49.4		25.98	15.28	10.8	17.54
Average	35	35.45	29.55		42.85	32.9	24.25		21.5	26.5	52		30.75	18.86	11.07	17.56
SD	2.40416	5.44472	3.04056		8.83883	9.19239	0.353553		8.20244	4.52548	3.67696		30.94	18.87	11.69	17.97
													31.9	18.99	11.87	18.06
													32.86	21.23	13.01	20.11
													32.96	26.09	14.26	24.9
													33.74	26.44	14.58	26.59
													33.74	34.28	15.31	28.47
													34.76	38.43	15.37	28.71
													37.45	39.79	16.49	29.99
													37.6	40.06	16.49	30.57
													38.07	41.55	19.14	31.05
													40.66	42.05	20.74	31.39
													41.05	42.06	22.14	39.24
													42.99	46.36	22.28	42.2
													44.02	54.25	22.57	43.04
													44.72	66.49	23.03	43.4
													44.83	70.12	23.21	44.11
													47.97	70.76	23.64	45.78
													48.06	73.57	24.04	48.49
													48.57	77.42	24.71	49.15
													50.44	82.2	25.31	51.33
													57.46	85.59	25.81	51.83
													63.25	0	25.99	52.06
													66.12	0	26.17	53.41
													68.45	3.19	28.56	55.48
													70.66	3.68	29.85	57.19
													70.73	3.76	29.94	58.91
													70.81	3.9	30.15	60
													72.22	4.45	30.22	60.11
													73.19	6.1	32.07	60.24
													74.63	6.56	33.62	61.09
													75.59	7.31	34.05	61.1
													78.58	7.92	36.25	61.44
													81.28	9.33	37.82	61.53
													82.26	10.06	37.83	61.6
													82.6	10.43	38	62.44
													83.5	10.53	39.41	63.31
													86.53	13.25	40.6	63.86
													89.86	13.3	40.69	67.06
													0	14.49	41.15	67.36
													9.76	14.71	42.68	67.98
													12.38	15.04	42.87	69.22
													16.69	15.15	43.56	70.35
													18.01	15.5	43.84	72.16
													18.45	15.59	44.82	72.77
													19.42	16.3	45.02	73.04
													24.34	17.42	46.39	73.08
													25.25	17.69	46.57	73.35
													25.5	17.69	46.67	73.56
													26.84	17.76	46.9	76.41
													44.37	18.49	47.75	77.66
													47.61	19.67	47.78	78.4
													49.42	19.88	48.23	79.02
													50.3	20.21	48.33	80.25
													51.39	20.86	48.7	80.61
													51.79	21.4	48.78	81.63
													54.37	22.45	49.38	81.7
													54.92	23.09	50.17	82.4
													56.98	23.93	51.47	82.41
													58.01	25.18	51.66	83.13
													58.75	25.43	52.68	83.76
													59.25	26.32	53.1	83.87
													59.61	26.42	53.61	84.2
													60.92	26.42	53.7	86.1
													61.83	26.68	53.89	88.7
													62.05	27.85	54.16	2.78
													63.15	29.41	55.12	5.23
													68.38	29.49	55.9	5.74
													69.14	30.53	56.42	11.67
													69.62	31.64	58.9	12.4
													72.41	31.71	59.16	14.61
													73.91	32.77	59.21	15.8
													74.21	33.28	59.47	18.16
													76	35.85	60.39	18.52
													78.71	40.44	61.67	21.71
													79.71	40.72	62.84	21.72
													80.67	41.75	63.52	22.76
													84.31	42.32	64.79	23.26
													84.91	44.71	66.1	24.94
													86.24	44.76	66.54	28.17
													86.48	45.14	66.78	29.19
														47.67	68.13	29.74
														48.91	69.27	31.74
														49.12	70.6	32.34
														50.78	71.23	33.1
														52.2	71.39	35.1
														52.77	73.67	35.96
														54.21	74.15	36.75
														55.81	74.67	37.11
														56.2	75.85	37.12
														56.44	76.19	37.13
														56.61	76.94	38.3
														57.87	77.28	38.32
														59.47	77.62	40.3
														61.83	77.93	41.38
														62.41	78.4	43.16
														62.48	78.57	43.73
														64.91	79.97	44.85
														65.89	80.87	45.71
														67.91	82.32	46.12
														70.31	83.82	48.45
														70.58	84.92	50.67
														71.37	86	51.17
														72.54	86.22	51.18
														74.67	88.42	51.81
														75.6	0	52.92
														77.32	0	53.32
														79.48	0	53.89
														81.26	0	54.82
														82.54	0	54.97
														84.2	3.32	56.09
														84.64	4.03	56.3
														86.43	6.74	59.67
														87.76	9.82	59.85
														89.76	12.62	60.58
															15.26	60.86
															16.92	61.5
															17.25	61.85
															20.35	62.14
															20.83	62.84
															21.01	63.3
															22.63	64.72
															23.49	65.53
															24.1	66.04
															24.56	66.08
															28.88	66.98
															29.69	66.99
															31.28	67.18
															32.07	67.56
															33.53	68.73
															37.46	69.14
															37.7	69.32
															39.81	69.4
															40.2	70.33
															42.19	71.06
															44.25	71.09
															45.27	72.3
															45.64	72.37
															45.89	72.53
															50.46	72.67
															51.04	72.93
															53.16	73.07
															53.58	73.38
															53.93	73.62
															56.5	75.14
															59.83	75.55
															60.18	76.12
															60.26	76.99
															61.37	77.96
															62.61	78.32
															63.25	79.17
															67.28	79.3
															68.02	79.36
															68.43	79.42
															69.56	79.5
															69.7	79.76
															73.27	80.26
															74.23	80.91
															76.33	80.94
															81.53	81.37
															83.97	81.5
															84.48	82.48
															88.26	83.34
															89.39	83.37
															90	84.82
																86.2
																87.05
																87.58
																88.19
																88.9
																89.31
																89.84
																90
