# Supplementary material for: 27 T ultra-high static magnetic field changes orientation and morphology of mitotic spindles in human cells
Source: eLife. 2017 Feb 28;6:e22911. doi: 10.7554/eLife.22911 (PMC5370190; doi:10.7554/eLife.22911)
Supplement: Figure 5—source data 2. — This is the source data for Figure 5G. DOI: http://dx.doi.org/10.7554/eLife.22911.019 [file elife-22911-fig5-data2.xlsx]

## Sheet: Figure 5G
	RPE1													Prometaphase (°)		Metaphase (°)
	Prometaphase (%)													Control	27 T	Control	27 T
	Control				Sham				27 T					0	0	0	0
	Parallel	Others	Normal		Parallel	Others	Normal		Parallel	Others	Normal			0	0	0	7.86
NO 1	47.3	25.5	27.2		37.9	34.5	27.6		55.9	26.5	17.6			3.13	0	0	9.17
NO 2	20.8	54.2	25		34.5	31	34.5		47.3	30.2	22.5			3.91	0	0	16.12
Average	34.05	39.85	26.1		36.2	32.75	31.05		51.6	28.35	20.05			4.81	4.94	0	16.22
SD	18.7383	20.294	1.55563		2.40416	2.47487	4.87904		6.08112	2.6163	3.46482			6.66	5.81	0	16.38
														6.91	7.76	1.97	19.95
	Metaphase (%)													8.91	8.96	3.39	21.16
	Control				Sham				27 T					9.41	9.61	3.66	21.46
	Parallel	Others	Normal		Parallel	Others	Normal		Parallel	Others	Normal			10.29	9.67	4.08	25.71
NO 1	38.9	27	34.1		33.3	36.2	30.5		19.4	30.6	50			10.57	10.49	4.09	25.78
NO 2	41.9	24.2	33.9		26.5	38.6	34.9		11.1	30.8	58.1			11.79	10.5	6.42	28.52
Average	40.4	25.6	34		29.9	37.4	32.7		15.25	30.7	54.05			13.33	11.14	8.26	29.16
SD	2.12132	1.9799	0.141421		4.80833	1.69706	3.11127		5.86899	0.141421	5.72756			13.53	12.69	9.09	30.31
														16.25	20.69	10.1	31.13
														16.76	20.86	10.52	32.09
														22.65	21.36	11.05	33.09
														23.31	21.99	11.42	34.26
														24.19	29.39	12.18	35.41
														24.28	30.87	14.18	36.27
														24.49	31.48	14.4	37.83
														24.74	31.58	14.84	40.34
														25.31	33.3	16.3	40.6
														26.77	34.63	16.5	42.1
														27.03	48.47	16.53	42.33
														28.36	55.68	16.88	42.42
														30.42	57.31	17.12	43.24
														34.33	58.22	18.17	44.08
														34.75	66.21	18.56	45.33
														34.92	66.59	18.99	46.09
														36.44	67.14	19.16	46.29
														39.59	69.6	20.03	46.29
														39.72	75.77	20.07	50.69
														40.97	84.37	20.33	50.92
														41.73	0	22.52	51.8
														46.1	0	22.81	51.93
														46.83	0	22.82	52.32
														52.81	0	23.2	52.43
														59.07	0	23.88	52.66
														59.11	0	24.08	52.88
														62.64	0	25.08	52.89
														63.3	0	25.57	53.15
														65.9	6.14	26.42	53.66
														67.8	6.19	26.6	53.69
														67.99	6.43	27.06	55.83
														69.21	7.12	27.06	56.49
														70.39	7.57	27.4	56.92
														70.56	9.86	27.64	57.98
														78.53	9.9	28.22	58.11
														79.91	10.6	31.35	61.01
														85.59	11.3	32.12	62.57
														87.17	11.63	32.32	63.5
														89.33	11.85	32.64	64.43
														90	11.94	32.77	65.05
														90	12.07	32.94	66.49
														0	12.64	33.96	67.15
														5.95	13.64	34.37	68.32
														9.73	14.46	36.05	68.74
														10.79	15.02	38.07	68.88
														13.29	15.68	38.66	69
														15.13	15.99	38.85	69.74
														16.73	16.03	39.21	71.32
														19.79	17.89	40.33	72.74
														23.44	18.18	42.09	73.6
														29.1	18.61	43.46	73.62
														30.14	18.66	43.62	73.68
														33.37	18.67	46.07	73.73
														34.09	19.56	47.36	73.93
														34.9	20.46	48	73.99
														36.07	20.62	48.22	74.56
														36.75	20.86	48.3	74.8
														37.74	20.88	51.11	74.84
														39.36	21.64	51.39	75.32
														39.74	21.69	51.9	75.52
														39.98	22.2	52.06	75.54
														42.15	24.84	52.25	76.79
														43.75	24.96	52.72	76.89
														44.65	25.17	52.76	77.34
														46.81	25.48	53.79	79.55
														47.58	25.68	54.23	79.59
														52.26	25.9	55.03	79.7
														53.08	25.99	55.31	79.74
														53.32	25.99	58.27	80
														53.55	26.23	60.42	80.04
														55.27	26.28	61.53	80.33
														55.57	26.31	63.69	80.86
														55.8	26.59	64.07	81.67
														57.11	27.36	65.41	82.01
														57.5	28.17	65.58	82.68
														59.29	28.43	65.67	82.7
														59.45	28.75	66.11	82.81
														62.23	29.17	69.95	82.99
														65.23	29.26	70.08	83.02
														65.24	29.67	71.63	83.35
														68.34	29.91	71.82	83.71
														69.78	30.91	71.87	83.84
														71.82	31.12	72.91	83.89
														73.87	32.5	73.92	84.43
														81.46	34.14	74.44	84.5
														82.08	36.04	74.79	85.05
														82.1	36.91	75.14	85.56
														82.17	37.2	75.44	86.17
														85.48	37.3	75.7	86.28
															37.55	76.41	86.46
															38.43	76.64	86.54
															39.98	77.5	86.72
															40.43	77.66	87.47
															40.86	77.67	87.47
															41.27	79.22	87.86
															41.3	79.65	88
															41.86	81.05	88.29
															42.19	81.26	88.79
															43.01	81.31	88.85
															43.28	81.59	89.24
															44.12	81.69	89.64
															44.68	81.7	89.94
															45.07	82.66	90
															46.35	83.15	2.69
															46.38	83.34	13.67
															49.35	83.44	18.46
															49.81	83.78	26.2
															50.52	84.41	28.34
															51.82	85.26	28.5
															52.57	89.81	28.86
															52.63	90	34.25
															52.82	90	42.57
															54.54	0	47.86
															55.79	0	48.55
															55.9	0	49.35
															58.4	7.76	51.11
															58.41	9.3	51.56
															58.44	10.92	55.17
															58.48	11.09	56.64
															58.8	12.29	57.34
															60.32	13.33	59.71
															60.59	14.52	60.78
															60.64	16.03	61.33
															61.14	16.14	65.51
															61.24	17.64	70.71
															62.32	18.72	71.3
															63.14	19.31	72.4
															63.45	19.41	74.57
															64.52	19.86	80.13
															65.22	19.93	80.15
															65.48	23.69	83.57
															65.7	26.17	83.65
															65.75	26.97	84.73
															66.01	27.18	85.41
															68.98	27.81	86.29
															69.05	28.5	86.49
															69.33	28.78	88.58
															70.4	28.88	90
															72.4	30.18	90
															73.59	30.89
															73.9	31.26
															74.07	35.98
															75.8	38.85
															78.37	39.27
															81.9	40.35
															82.75	41.07
															84.37	41.98
															84.8	42.67
															86.71	43.3
																48.12
																48.73
																50.14
																56.23
																61.13
																62.04
																64.23
																66.44
																67.39
																70.32
																70.44
																70.77
																71.57
																71.65
																73.84
																76.1
																79.21
																80.93
																82.46
																84.82
																85.95
																86.88
																87
																87.84
																88.87
