# Supplementary material for: 27 T ultra-high static magnetic field changes orientation and morphology of mitotic spindles in human cells
Source: eLife. 2017 Feb 28;6:e22911. doi: 10.7554/eLife.22911 (PMC5370190; doi:10.7554/eLife.22911)
Supplement: Figure 6—source data 1. — This is the source data for Figure 6D. DOI: http://dx.doi.org/10.7554/eLife.22911.024 [file elife-22911-fig6-data1.xlsx]

## Sheet: Figure 6D
CNE-2Z (a/b)					RPE1 (a/b)
Sham		27 T			Sham		27 T
Angle (°)	a/b	Angle (°)	a/b		Angle (°)	a/b	Angle (°)	a/b
84.8	1.08629	87.8	1.83829		89.6	1.26923	25.7	1.45378
83.5	0.869231	82.8	0.895381		37.7	1.67368	1.5	1.8843
5	2.63291	74.1	1.36247		57.3	1.07018	31.2	1.71538
67	2.14953	44.1	0.972261		46.1	2.23469	1.2	2.92784
46	2.56044	89	1.34615		46.6	0.924205	4.5	3.44578
44.2	1.72973	78.5	2.19753		11.9	1.06369	45	2.82667
49.1	2.16216	56.9	0.869817		31.2	1.66667	25	2.53247
74.9	1.77165	35.1	3.59404		79.7	0.766667	51.2	2.57143
6	1.74138	15.6	2.16541		4.3	1.98925	24.7	2.1134
49.1	2.16514	86.6	2.05834		13	1.15084	83.8	1.73958
23.8	2.71074	45.3	0.936998		36.3	1.41304	90	1.25309
77.3	1.01143	39.4	0.870518		78.8	0.834395	55.7	2.18095
11.8	1.00743	88.3	1.95698		77.8	1.73469	18.4	1.02469
22.1	2.26506	10.6	1.48709		5.6	2.26357	88.8	1.66917
7.5	2.21296	80.5	1.0035		16	1.53125	46.3	3.32184
88.1	2.44086	83.3	0.987118		71.7	1.63	24.6	2.016
12.7	1.24603	73.7	2.31481		45	2.16867	60.2	2.10417
3.7	1.34266	78.2	1.26488		56	1.69504	67.8	1.85593
0.9	1.34058	38.7	1.16175		62.1	1.7265	74.8	1.50336
22	0.796667	58.1	1.98201		19.5	2.56989	26.1	1.07927
65.8	2.03759	70.8	2.15898		31.5	1.35928	47.2	3.01075
25.1	0.930736	70.9	1.08481		59.6	1.02841	9.7	2.352
86	2.65169	55.9	1.36868		40	2.14706	12.3	2.61728
3.2	1.20787	25.7	1.42016		58.4	1.2561	87.2	3.46774
16.8	1.95082	72	1.23826		11.9	1.99315	80.7	3.73684
71.4	1.14474	19.7	1.55925		1.3	1.0356	9.5	1.66423
15.1	1.01838	8.8	0.815061		75.2	2.02222	75.5	2.08696
61.6	1.07742	42.6	1.4802		79.1	1.86517	2	2.44944
33.1	1.35897	86.6	1.53109		69.2	2.78049	19	2.64356
81.5	1.11392	0.4	0.935564		5.3	2.71111	34.9	1.50758
16.4	1.00385	30.8	1.77482		68.4	1.53543	69.8	1.90351
69.2	2	50.4	1.76		16	2.5	30.1	2.55952
33.3	1.40984	74.4	1.3799		29	3.45763	42.6	2
31.4	1.65333	44.7	1.42974		87.8	1.77477	22.9	2.18947
72.9	0.949153	69.8	0.924503		5	2.75532	80.1	3.91379
72.1	1.89189	28.9	2.48856		42.2	1.125	59	2.42169
35.3	0.689394	50	1.63482		75.1	2.5	74.9	2.01299
63.9	2.18803	83.2	2.00867		86.3	3	52.1	1.83088
61.9	1.38889	50.9	1.54986		19.5	1.48	20.1	1.58278
73.6	0.872951	11.9	2.75758		61.5	1.39103	69.4	3.07692
16.5	1.09816	51.3	2.61295		51.2	1.89076	81.4	1.87586
26.9	1.77165	41	3.21519		4.8	2.15596	61	2.23529
58.5	1.55	26	1.51577		21.8	2.78161	77.7	3.56716
15.5	1.3949	83.8	2.18193		45.3	2.59783	87.7	3.82759
48.2	1.10897	49.6	1.39522		80.5	2.23333	46.5	1.98
32.7	2.85333	70.9	1.46127		71.4	1.28671	84.3	1.86047
79.9	1.00971	86.7	1.28766		84.1	1.67045	89.6	2.23585
89	1.81818	7.4	1.68394		3.8	1.12766	50.9	3.77273
19.4	1.41935	61.6	3.24406		7.7	2.69231	38	4.28814
77.1	2	64.8	1.03469		81.4	1.30247	42.4	2.12727
16.3	2.47253	39.4	2.62211		11.8	3.10606	59.6	2.57647
1.6	0.853282	49.2	0.975051		23.9	1.62937	67.4	2.5
83.1	1.55195	5.4	1.1094		29.3	1.2517	74.2	1.80172
89.1	1.29078	74.1	1.79151		76.7	2.17949	16.4	2.04255
58.1	2.28409	69.4	1.45606		87.7	1.17834	51	2.56604
7.9	0.940541	74.3	1.95135		79.3	1.88372	72.3	2.56164
54.1	1.09125	21.4	1.3257		75.9	2.68571	69.8	2.83333
77.5	1.71681	41.7	1.29304		19.2	1.50704	8.1	2.01905
59.3	0.958549	81.8	1.7561		14.9	1.81132	25.8	1.68794
4.2	2.01515	76.9	2.46234		31	1.0678	64	2.87097
33.1	2.37255	89.5	1.87696		36.2	1.09302	40.3	1.60294
1.4	2.1453	29.1	2.04319		24	1.77174	17.2	2.65714
70.8	0.988235	42.3	2.10592		10.4	0.851429	24.8	1.77444
6.2	2.47525	46	1.1074		0.8	1.18085	4.1	1.78788
70.9	1.00592	55.5	0.842593		7.7	1.66418	67.1	4.48214
40	1.26897	25.8	0.864803		32.1	2.04396	4	3.09783
28.6	1.01093	8.7	0.866117		29.3	1.01961	49.1	2.07965
83.6	1.55072	53.5	1.12014		28.5	1.49153	50.1	3.11268
79.5	1.10881	15.9	2.06979		76.5	2.72603	62	1.9542
82.4	1.41509	40.9	1.32492		1.9	2.56944	37.2	3.43038
74.5	1.85385	50.6	1.07378		76.9	1.11053	77.3	1.32
2.9	1.25134	34.4	1.35129		64	2.54651	56.7	3.09877
63	1.18919	47.2	1.48687		43.2	1.26119	17.6	4.16923
74.1	1.0885	3.4	1.08036		88.6	2.50667	15.3	3.07812
28	0.939394	43	2.4846		30.1	1.69677	84.1	2.6
22.6	1.62252	84.7	1.18013		40.4	2.69231	33.2	3.25676
82.5	1.01176	84.4	1.13517		52.6	2.24719	57	4.27778
26	1.94737	81.3	1.30803		73.3	1.12996	48.1	1.70732
10.2	1.41304	61.5	1.92028		50.1	1.31343	27	4.40741
64.6	1.51136	68.5	1.45207		40.1	2.83019	75.5	3.20833
5	1.02381	59.2	2.02999		35.5	2.95	47.3	3.90323
2.2	1.79231	38.3	0.748106		67.5	2.95506	72.4	3.60938
36.3	2.18349	82.1	1.11032		45.6	3.26866	86.8	3.63636
7.7	1.125	37.4	0.771171		33	1.18782	17.1	3.69444
15.1	1.065	61.3	1.25195		82.4	2.34483	53.8	3.15
67.4	2.66667	12.2	0.852213		62.9	1.64516	21.4	1.90972
87.6	1.23164	52.4	1.74086		63.1	2.96053	88.1	2.7191
23.9	1.03279	51.8	1.66471		36.2	2.98734	39.5	1.86188
0.5	1.27972	31.7	1.12187		25.5	3.54286	1.4	2.89091
32.8	1.11034	88.5	0.856875		60	2.75581	83.4	1.60736
37.2	2.22105	57.7	1.02319		74.7	2.12088	59.8	2.67089
63.7	0.771845	46.3	2.62184		74.6	1.66901	41.7	3.58427
12.2	1.88281	61.3	2.04335		65.6	2.57333	16.4	1.51613
75.5	1.07865	85.5	2.14242		37.6	2.01961	0.5	2.17143
34	0.840816	82.5	1.3216		31.4	0.910891	19.4	2.19626
54	1.33333	60.2	0.826607		27.7	0.895954	58.7	1.92742
52	1.08257	22.9	1.28509		87.6	2.59036	18	1.20645
44.4	1.39597	9.3	1.37646		45.8	2.05357	29.9	3.19178
23.5	1.41477	6.3	0.879883		36.3	1.94118	63	3.19178
2.3	1.46512	55.5	1.83609		38.7	2.69748	59.8	2.05155
78.6	1.42442	33.3	1.80965		46.9	3.7377	56.3	1.42574
51	1.27673	28.8	1.5		68.7	0.875472	32	2.67416
0.4	0.873188	26.6	0.807761		78.9	3.96721	45	1.60494
72.2	1.83636	80.2	1.13124		52.2	2.89655	23.1	1.86719
35	0.928962	63.6	1.78956		23.6	2.95294	68.8	2.97015
10.7	2.30357	42.5	1.57478		89	1.95556	79.9	3.66667
45.9	0.779116	56.1	2.00438		63.3	3.52	62.9	4.17647
9.2	2.20213	33.4	1.97643		77.5	3.64615	65.2	2.17647
0.3	1.10667	68.7	1.83667		89.2	1.57246	33.7	2.6125
60.8	1.47059	56.1	1.57245		45.6	2.06569	69.3	2.6087
42.3	1.92241	40.4	1.85564		52.4	2.21782	33.9	1.12571
70.2	1.67368	60.4	1.62447		82.6	5.0566	72.8	1.59124
84.3	1.7459	59.5	1.35489		20.6	2.46465	73.2	4.22034
71.3	0.83105	16.3	1.17637		22	1.13559	10.1	2.06557
46.8	1.088	7.6	0.928453		85	1.05442	69.5	2.02083
10.9	1.5969	56.3	1.00348		19.2	3.58571	23.8	1.91339
32.6	2.39252	50.7	1.13134		28.5	3.88235	3.3	1.01961
64	1.7265	39.4	1.22303		39.9	4	13.1	3.60494
59.2	1.18493	27.3	0.946746		71.9	4.64706	51	2.37363
65.7	1.76636	54.3	0.85031		86.6	1.34228	73.1	3.72
77.2	1.36957	32.7	1.47387		61.3	1.73684	53.3	1.94783
47.9	1.0641	41.1	1.28144		77.9	2.74419	7	3.01408
48.3	1	66.2	1.6772		39.4	3.25301	3.6	2.19802
30.2	2.1978	76.2	1.71104		17.7	1.4434	0.4	3.12
69.7	1.49474	50.9	1.46939		51.1	1.68317	57.3	2.76119
0.9	0.92766	13.9	2.01733		61.2	1.54472	18.9	2.79121
63.6	0.921951	68.4	2.28429		8.6	2.5641	82.3	3.45349
83.1	2.51899	57.2	1.18176		11.3	1.29825	77.1	4.45312
83.2	1.3354	65.7	1.88392		59.7	3.63158	24.6	2.78571
17.8	1.29487	77.5	1.82603		55.2	3.13953	75	3.44615
10.8	0.705069	90	1.13463		4.9	4.78431	62.7	2.51327
50.9	1.47619	79.3	3.33901		74.4	1.84348	68.4	2.47826
42.8	2.85294	27.5	1.25444		40.3	2.58242	64.7	3.71795
23.6	1.24138	29.7	1.09808		21.8	1.77273	56.9	4.3
19.8	2.29412	40.8	0.983933		87.1	2.23364	23.4	2.4
89.1	4.37209	39.4	2.07692		80.5	0.901235	22.9	1.51678
13.3	2.83582	53.3	0.98558		30.7	3.47222	59.3	2.98507
17.9	2.86154	57.4	1.53073		21.8	2.42718	66.8	2.86957
86.6	0.966102	49.6	0.745273		40.1	1.89362	40.2	1.89655
89.3	0.909449	87.7	1.4995		53.7	1.35152	75.5	4.35849
60.6	0.876364	41.1	0.87846		0	1.98113	3.5	2.58947
84.8	0.804511	2.2	1.55633		26.6	2.40404	72.2	1.95556
86.6	2.79167	49.5	0.736719		85.1	4.45763	26.4	2.81176
1.5	2.1375	67.2	2.44679		76	1.56716	10.2	1.03365
63.2	2.83333	14.8	1.46699		23.3	3.26582	9.7	2.74
57.6	1.6993	45.5	1.13013		26.4	2.41818
61.5	3.67241	39.4	1.69304		8.3	1.85849
78.9	1.96	71.6	1.93374		70.2	5.03922
59.5	2.34921	50	2.19915		61.7	3.15854
58.3	0.805556	69.7	2.12204
51.9	2	44.5	2.23953
53.8	3.27143	58.5	1.44381
5.9	4.23077	70.8	3.39609
24.6	2.16832	85.6	2.20741
64.8	2.39506	27.8	0.74023
27.6	1.56667	15.4	1.19962
7.1	1.56911	49.4	1.69282
9.6	1.39535	76	1.32663
65.8	3.42857	22.9	1.11913
8.3	1.03727	66.6	2.2814
3.9	2.82857	1.3	1.00177
77.3	2.79012	28.1	2.08556
29.2	1.88235	46	2.66667
6.3	1.05594	82.8	2.26646
59	2.53623	69.2	1.75871
71.4	2.27273	40.6	1.01542
76.2	3.16	4.5	0.724153
46.9	1.05	24	1.20563
58.7	1.46377	29.4	1.343
27.5	1.87778	66.8	2.1446
6.1	2.47573	45.4	0.96355
29.3	3.11111	43.3	1.74597
61.3	1.62745	75.8	1.90116
75.1	3.50943	63.7	1.91022
16.4	3.20312	24.4	1.25147
25.9	3.92063	58.7	2.39342
64.5	3.87037	29.8	2.32745
81.4	2.75	57.6	3.22404
11.7	1.44755	66.6	0.802198
25.1	2.14141	85.3	1.37938
74.9	2.30588	34.8	1.68421
84.3	1.27731	13.4	3.05263
86.3	1.65468	49	2.61538
3.5	0.68662	4.2	1.10625
0.8	1.15508	6.8	1.34328
83.6	1.27941	48.5	2.10112
36.9	1.90756	45.5	1.05357
0.5	1.16892	58.1	1.85185
29.5	1.00633	71.1	1.79032
37.4	1.61468	42	1.65979
86.7	2.28395	6.3	2.5125
11.3	1.58491	82.6	2.40278
39.7	1.2028	67.1	1.07643
17.5	1.98148	60.6	1.11321
80.1	1.22378	81.8	1.1375
61.4	1.25185	0.1	1.55224
10	1.13907	88.8	1.51613
19.7	1.93478	88.2	1.05682
44.3	1.15385	34	2.41053
7.2	1.04	27.8	1.5969
49.9	2.05882	80.1	2.03261
2.4	2.96939	75.5	2.4
38.8	1.14935	30.3	1.20442
76.7	1.93407	50.9	1.30526
		12.2	2.2735
		7.5	0.918478
		29	2.27473
