# Supplementary material for: 27 T ultra-high static magnetic field changes orientation and morphology of mitotic spindles in human cells
Source: eLife. 2017 Feb 28;6:e22911. doi: 10.7554/eLife.22911 (PMC5370190; doi:10.7554/eLife.22911)
Supplement: Figure 6—source data 2. — This is the source data for Figure 6E. DOI: http://dx.doi.org/10.7554/eLife.22911.025 [file elife-22911-fig6-data2.xlsx]

## Sheet: Figure 6E
CNE-2Z (Angle °)
Control		Sham		27 T
c/d<1.5	c/d>1.5	c/d<1.5	c/d>1.5	c/d<1.5	c/d>1.5
67.6	42	16.4	33.3	70.9	90
57.4	78.4	3.5	10.9	45.3	59.2
25.7	21	84.8	60.8	0.4	50
57.9	76.5	83.5	6.2	69.8	16.3
77.1	47.5	86.6	61.3	56.9	76
25.6	46.2	22	7.1	88.5	15.6
44.6	6.1	54.1	11.3	26.6	22.9
48.6	7.3	0.4	84.3	83.3	50.9
16.4	49.2	84.8	76.7	82.8	12.2
21.8	17	35.3	84.3	54.3	43
14.5	6.7	11.8	33.1	60.6	67.2
51.8	9.8	58.3	67	80.5	34.8
20.6	38	73.6	33.1	39.4	75.8
10.6	76.1	1.6	7.5	4.5	13.9
31.1	78.3	60.6	36.3	85.3	58.1
19.8	74.9	34	37.4	7.5	41
37.9	4	45.9	77.5	66.6	19.7
5.2	58.4	38.8	36.9	82.1	51.8
37.6	21.5	15.1	49.1	55.9	66.8
44.2	47.8	64.6	89	29.4	61.3
25.8	51.2	63	24.6	25.8	50.7
36.1	81.2	52	17.5	45.4	61.3
48.3	61.3	0.3	69.2	27.5	50.9
79.5	29.5	23.9	63.9	46	58.1
14.4	24.3	63.7	26	72	29.8
67.4	61.6	74.1	32.6	49.6	74.3
77.5	16.8	71.3	58.5	44.1	49.4
3	4.8	0.9	78.9	60.2	87.7
36.9	44.2	81.5	49.1	22.9	35.1
22.8	85.4	0.8	63.2	7.6	39.4
25.1	73.7	28	65.7	55.5	2.2
79.1	23.3	89.3	25.1	30.3	69.2
44.6	67.3	15.1	72.1	82.5	32.7
55.8	89	10.8	2.4	53.5	56.1
28.4	1.3	79.5	72.2	3.4	73.7
78.3	19.3	79.9	16.3	33.3	68.7
47	21	3.2	88.1	80.2	63.7
77.2	41.9	78.6	37.2	50.6	85.5
83.1	21.3	63.6	29.2	15.4	43.3
45	6.4	59.3	77.1	49.2	69.7
62.6	53.6	44.2	69.7	69.4	39.4
37.1	10.6	16.5	1.5	86.7	46.3
82.5	51.7	25.1	42.8	6.3	29
23.9	7.7	7.9	83.1	45.5	39.4
35.1	26.4	2.9	9.2	9.3	71.6
39.4	1.2	48.2	16.4	88.2	15.9
55.6	30.6	23.5	30.2	26	87.8
21.7	40	28.6	86	37.4	50.4
67.5	0.5	77.3	27.5	4.2	50
6.9	76.3	70.8	77.3	84.4	30.8
31.2	20.2	72.9	32.7	34.4	28.1
36.8	53.5	10	71.4	21.4	89.5
19.2	43.8	35	86.7	45.5	85.6
57.6	53.5	29.5	74.9	49.5	34
14.7	81.5	0.5	81.4	8.8	52.4
71.5	16.2	51	23.8	0.1	70.8
2.8	68.8	65.8	19.8	38.3	80.1
25.8	7.5	70.9	19.7	38.7	48.5
62.5	45.8	44.3	53.8	25.7	83.8
35.6	15.3	58.7	64.8	47.2	42
39.6	37.8	46.9	58.1	67.1	68.4
79.9	45.6	87.6	67.4	40.6	76.2
84.8	14.5	10.2	49.9	81.3	42.3
59.7	59.6	23.6	64.5	5.4	60.4
85.5	48.2	31.4	22.1	50.9	61.6
32.7	65.1	59.2	86.6	41.1	82.8
13.4	71.7	6.3	5	8.7	86.6
88.6	48.1	75.5	29.3	53.3	76.9
26.8	31.9	44.4	3.9	59.5	46
7.9	55.8	17.8	59	71.1	49
60.5	19.8	61.6	25.9	31.7	39.4
39	32.8	71.4	13.3	64.8	70.8
28.7	2	80.1	17.9	27.8	66.2
78.6	53.3	61.4	59.5	10.6	88.3
37.1	75.1	22.6	61.5	24	83.2
20.7	54.1	5	65.8	27.3	13.4
69.4	41.1	48.3	76.2	1.3	78.5
10.2	62.5	0.9	75.1	40.9	65.7
63.7	8.1	9.6	5.9	81.8	6.3
3.9	73.4	15.5	89.1	86.6	75.5
	82.3	8.3		29.7	66.6
	66.6	11.7		24.4	51.3
	23.6	82.5		57.7	11.9
	26.4	7.2		58.5	79.3
	18.3	61.9		40.8	58.7
	35.4	89.1		57.2	42.5
	33.4	57.6		56.3	44.5
	47.8	83.2		42.6	77.5
	50.4	82.4		70.9	57.6
	58.2	3.7		41.1	40.4
	14.8	7.7		55.5	82.6
	6.1	47.9		74.4
	33.1	83.1		28.9
	59.9	54		44.7
	25.8	83.6		6.8
	35.4	19.4		12.2
	58.9	2.3		57.4
	18.2	77.2		68.5
	33.9	12.2		88.8
	46.7	0.5		7.4
	0.1	39.7		49.6
	43.6	74.5		74.1
	44.6	32.8		78.2
	67.1	27.6		81.8
	8	16.8		89
	64.6	46		84.7
	80.3	40		28.8
	63.4	86.3		74.1
	38	50.9		14.8
	70.7	83.6		41.7
	57.4	51.9		29.1
	86.5	4.2		56.1
	47.3	42.3		33.4
	34.6	46.8		63.6
	51.5	6.1		61.5
	42.5	26.9		27.8
	28.7	12.7
	83.3	1.4
	78.5	2.2
	42.6	10.7
	60.5	6
	70.5	74.9
	4.6	70.2
	4.4	64
