# Supplementary material for: 27 T ultra-high static magnetic field changes orientation and morphology of mitotic spindles in human cells
Source: eLife. 2017 Feb 28;6:e22911. doi: 10.7554/eLife.22911 (PMC5370190; doi:10.7554/eLife.22911)
Supplement: Figure 6—source data 3. — This is the source data for Figure 6F. DOI: http://dx.doi.org/10.7554/eLife.22911.026 [file elife-22911-fig6-data3.xlsx]

## Sheet: Figure 6F
RPE1 (Angle °)
Control		Sham		27 T
c/d<1.8	c/d>1.8	c/d<1.8	c/d>1.8	c/d<1.8	c/d>1.8
27.5	80.2	80.5	45.3	3.3	56.7
76.3	79.3	68.7	16	10.2	0.5
68.4	20.3	46.6	80.5	45	51.2
69.6	51.2	1.3	51.1	18.4	59.8
45	80.4	73.3	5.3	90	83.8
77.2	42.3	42.2	4.3	77.3	32
67.7	32.7	59.6	62.9	20.1	59
73.7	57.3	0.8	40.4	16.4	72.2
9.8	28	50.1	40	4.1	49.1
83.9	60.9	31	45.8	74.8	19
6.1	77.9	27.7	19.5	25.8	62.7
49.8	1.3	57.3	79.3	81.4	24.7
2.1	74.5	78.8	51.2	83.4	72.3
60.2	12.2	19.5	52.4	16.4	25
52.7	83.2	79.7	69.2	26.1	59.6
58.7	11	3.8	39.4	9.7	69.5
76.4	79.9	11.9	36.3	40.3	46.3
61.8	26.6	84.1	37.7	84.3	30.1
41.7	67.9	89.6	32.1	24.8	68.8
32.5	75.8	53.7	21.8	18	50.9
62	21.1	10.4	46.1	61	4.5
32.7	60.2	36.3	52.6	34.9	26.4
28.1	18.3	81.4	55.2	33.9	12.3
4.6	5.7	76.9	87.1	52.1	45
44.4	47.2	36.2	8.6	88.8	4
8.5	40.8	11.3	65.6	21.4	24.6
32	63.4	13	23.6	46.5	9.7
83.3	14.7	71.4	40.3	10.1	63
27.4	37.1	0	26.4	23.8	75.5
2.7	16.2	31.5	45	67.8	74.9
18.8	50.6	75.9	76.7	72.8	69.8
53.1	59.8	33	75.2	22.9	23.4
73.7	7.1	29.3	79.1	3.5	18.9
78.7	15.9	30.1	67.5	9.5	86.8
42.9	6.6	22	52.2	31.2	1.4
49.4	25.3	43.2	1.9	74.2	59.8
28.1	64	5.6	88.6	64	69.3
27.7	48.7	31.4	87.6	19.4	65.2
5.5	23.4	38.7	82.4	39.5	87.2
14.4	59.6	23.9	64	62	33.2
75.2	89.7	14.9	75.1	0.4	37.2
12.7	89.6	7.7	77.9	51	88.1
65.1	71.8	29.3	19.2	42.6	57.3
51.9	22.3	61.5	61.7	23.1	72.4
89.4	79.6	86.6	74.7	8.1	69.4
42.4	34.8	87.7	30.7	3.6	66.8
65	6.4	58.4	60	69.8	33.7
8.1	84.3	74.4	23.3	22.9	47.3
46.5	19.5	85	76.5	24.6	7
48.5	71	71.7	26.6	17.2	17.1
23.7	65.4	7.7	63.3	2	15.3
32	29	17.7	36.2	67.4	68.4
31.7	7.6	31.2	86.3	40.2	13.1
83.1	15.3	56	35.5	1.5	29.9
74.5	36.6	89.2	29	53.3	80.7
10	79.2	87.8	59.7	42.4	59.3
58.1	61.7	68.4	71.9	51	38
49.2	70.2	45.6	63.1	58.7	67.1
69.5	7.8	61.2	25.5	56.3	41.7
53.6	34.2	28.5	77.5	1.2	17.6
	6.9	16	11.8	55.7	84.1
	18.2	11.9	85.1	53.8	79.9
	68	74.6	78.9	48.1	50.1
	62.5	5	46.9	89.6	27
	19.2	19.2	45.6	60.2	57
	30.4	24	4.9	56.9	77.7
	28.7	40.1	28.5	25.7	80.1
	15.8	37.6	82.6	75.5	82.3
	81.2	76	39.9	47.2	64.7
	83.5	21.8	70.2		73.2
	20.4	4.8			87.7
	51.4	20.6			75
	75.2	61.3			75.5
	47.8	40.1			77.1
	0.4	8.3			73.1
	45.5	77.8			62.9
	50.7	89
	46.3	62.1
	76.4	21.8
	23.1
	23.2
	16.4
	43.1
	24.7
	15.3
	21.6
	30.2
	77.9
	39
	53.3
	3.4
	5.8
	78.7
	81.1
	80
