# Supplementary material for: 27 T ultra-high static magnetic field changes orientation and morphology of mitotic spindles in human cells
Source: eLife. 2017 Feb 28;6:e22911. doi: 10.7554/eLife.22911 (PMC5370190; doi:10.7554/eLife.22911)
Supplement: Figure 7—source data 1. — This is the source data for Figure 7C. DOI: http://dx.doi.org/10.7554/eLife.22911.030 [file elife-22911-fig7-data1.xlsx]

## Sheet: Figure 7C
Control					27 T
CNE-2Z		RPE1			CNE-2Z		RPE1
Parallel (°)	Normal (°)	Parallel (°)	Normal (°)		Parallel (°)	Normal (°)	Parallel (°)	Normal (°)
75.775	86.665	85.49	79.5		64.1	89.79	74.4	71.66
67.98	51.875	92.87	77.935		67.735	106.27	66.98	63.34
62.39	77.335	75.525	65.75		76.355	76.255	73.965	103.8
72.62	72.86	68.29	66.705		61.91	76.28	81.04	90.025
79.925	68.055	60.155	63.885		34.69	80.255	73.04	120.595
41.035	69.395	79.83	83.715		86.31	56.295	85.43	83.68
56.69	40.36	82.585	89.24		53.915	82.32	84.03	116.47
56.58	53.885	74.8	59.345		52.14	50.025	114.7	95.845
101.175	56.87	83.065	68.15		40.925	79.295	75.09	102.355
57.665	60.36	85.51	74.81		47.235	63.505	77.345	86.285
34.48	72.8	93.68	81.345		35.91	60.5	85.055	96.435
57.765	95.655	85.19	70.96		78.485	94.36	72.985	81.495
100.14	79.005	87.13	71.09		59.87	68.285	73.98	90.435
59.13	63.85	52.49	65.93		48.7	81.33	59.85	75.54
84.51	74.42	77.885	78.33		75.14	75.15	101.325	65.615
77.36	56.965	49.76	92.64		45.755	87.685	79.005	74.19
50.47	57.55	56.87	56.88		86.9	91.42	62.97	102.01
55.93	75.145	76.165	71.345		70.035	98.39	69.215	99.945
67.615	60.395	86.875	64.775		87.515	79.31		74.065
57.57	64.105	80.25	77.77		52.47	73.5		114.375
59.14	87.49	67.945	94.37		58.555	74.035		114.7
56.12	34.89	77.955	91.875		79.63	91.42		96.56
80.84	88.06	58.785	79.4		72.705	61.865		79.175
80.24	55.075	71.58	92.565		58.545	71.605		79.055
64.53	52.305	74.26	47.57			83.925		104.785
82.62	67.825	80.115	74.23			89.82		76.27
68.935	62.735	76.245	73.395			68.06		59.915
54.94	66.535	68.29	104.45			84.1		80.91
72.395	66.83	101.73	47.91			71		73.225
51.655	72.42	87.48	57.99			99.97		98.645
69.545	58.025	90.515	62.835			91.095		63.78
77.25	61.095	66.66	83.075			105.995		78.67
86.955	49.815	110.215	82.425			78.475		67.625
64.645	61.7	108.575	83.6			98.215		102.285
89.935	42.275	105.595	86.065					93.41
90.09	65.305	104.725	76.175
45.605	54.755	75.2	90.08
50.2	62.765	74.695	87.14
61.54	79.74	74.405	81.51
72.52	74.05	67.525	88.985
62.415	68.715		79.865
	87.61		100.265
	70.77		47.58
	77.8		87.965
	67.52		97.615
	51.125		75.5
	73.635		77.995
	69.8		55.775
	92.485		86.515
	78.43		108.035
	77.26		84.05
	63.205
