# Supplementary material for: 27 T ultra-high static magnetic field changes orientation and morphology of mitotic spindles in human cells
Source: eLife. 2017 Feb 28;6:e22911. doi: 10.7554/eLife.22911 (PMC5370190; doi:10.7554/eLife.22911)
Supplement: Figure 7—source data 2. — This is the source data for Figure 7D. DOI: http://dx.doi.org/10.7554/eLife.22911.031 [file elife-22911-fig7-data2.xlsx]

## Sheet: Figure 7D
CNE-2Z					RPE1
Sham		27 T			Sham		27 T
Angle (°)	w (μm)	Angle (°)	w (μm)		Angle (°)	w (μm)	Angle (°)	w (μm)
84.8	6.16314	87.8	6.28467		89.6	5.61934	25.7	5.89124
83.5	3.29305	82.8	5.72993		37.7	5.31722	1.5	4.56193
5	4.35045	74.1	5.64234		57.3	5.58912	31.2	5.49849
67	4.25982	44.1	7.18248		46.1	6.82779	1.2	5.22659
46	4.13897	89	6.59489		46.6	3.53474	4.5	5.5287
44.2	5.40785	78.5	7.07299		11.9	4.62236	45	3.38369
49.1	4.86405	56.9	5.77737		31.2	5.04532	25	4.25982
74.9	4.07855	35.1	5.97445		79.7	6.79758	51.2	3.53474
6	3.11178	15.6	5.33577		4.3	5.64955	24.7	3.89728
49.1	4.77341	86.6	7.07664		13	5.2568	83.8	5.67976
23.8	7.43202	45.3	5.43066		36.3	4.77341	90	5.16616
77.3	5.49849	39.4	4.17883		78.8	3.02115	55.7	5.31722
11.8	3.02115	88.3	6.5		77.8	4.77341	18.4	3.9577
22.1	6.07251	10.6	5.60219		5.6	5.70997	88.8	5.70997
7.5	5.07553	80.5	4.39781		16	5.04532	46.3	4.95468
88.1	5.37764	83.3	5.75912		71.7	4.95468	24.6	5.61934
12.7	3.71601	73.7	5.9927		45	4.56193	60.2	4.65257
3.7	3.6858	78.2	5.48905		56	4.35045	67.8	4.89426
0.9	4.16918	38.7	6.13869		62.1	6.49547	74.8	4.77341
22	5.2568	58.1	5.81752		19.5	5.01511	26.1	4.77341
65.8	5.10574	70.8	5.90876		31.5	4.1994	47.2	5.46828
25.1	6.88822	70.9	5.77737		59.6	4.4713	9.7	4.07855
86	5.8006	55.9	6.55839		40	5.5287	12.3	5.04532
3.2	4.7432	25.7	5.93796		58.4	3.6858	87.2	6.70695
16.8	5.43807	72	5.90146		11.9	4.44109	80.7	4.59215
71.4	5.31722	19.7	4.89781		1.3	5.86103	9.5	3.74622
15.1	4.32024	8.8	6.87591		75.2	5.04532	75.5	4.77341
61.6	5.49849	42.6	6.26277		79.1	4.83384	2	4.1994
33.1	6.91843	86.6	3.77737		69.2	5.13595	19	6.10272
81.5	5.37764	0.4	5.20073		5.3	5.61934	34.9	3.26284
16.4	4.86405	30.8	6.17153		68.4	6.07251	69.8	4.80363
69.2	5.43807	50.4	6.62774		16	6.55589	30.1	5.5287
33.3	2.80967	74.4	5.69708		29	4.25982	42.6	4.7432
31.4	4.86405	44.7	5.20073		87.8	5.34743	22.9	5.04532
72.9	4.95468	69.8	5.75547		5	5.74018	80.1	4.95468
72.1	5.70997	28.9	3.43796		42.2	4.50151	59	5.43807
35.3	4.71299	50	6.39416		75.1	4.98489	74.9	4.35045
63.9	6.76737	83.2	7.28832		86.3	5.46828	52.1	4.65257
61.9	4.22961	50.9	7.26277		19.5	5.74018	20.1	3.74622
73.6	4.4713	11.9	4.79927		61.5	4.1994	69.4	5.13595
16.5	4.83384	51.3	5.62774		51.2	5.77039	81.4	5.37764
26.9	5.16616	41	5.69343		4.8	4.56193	61	4.35045
58.5	5.55891	26	5.98175		21.8	5.22659	77.7	8.45921
15.5	5.40785	83.8	5.41971		45.3	5.2568	87.7	6.19335
48.2	5.13595	49.6	7.16423		80.5	4.77341	46.5	4.86405
32.7	4.7432	70.9	6.59854		71.4	5.37764	84.3	3.71601
79.9	6.16314	86.7	9.5073		84.1	5.16616	89.6	5.70997
89	4.13897	7.4	5.27007		3.8	3.20242	50.9	4.92447
19.4	3.11178	61.6	5.13504		7.7	5.04532	38	5.22659
77.1	5.13595	64.8	6.31022		81.4	4.92447	42.4	4.50151
16.3	3.32326	39.4	4.9927		11.8	6.67674	59.6	5.04532
1.6	4.41088	49.2	3.60219		23.9	4.7432	67.4	6.88822
83.1	4.25982	5.4	4.62409		29.3	4.92447	74.2	4.95468
89.1	4.25982	74.1	4.42336		76.7	3.92749	16.4	4.25982
58.1	6.37462	69.4	4.64599		87.7	5.19637	51	4.04834
7.9	4.38066	74.3	4.30657		79.3	5.64955	72.3	5.34743
54.1	4.80363	21.4	4.84672		75.9	4.62236	69.8	5.07553
77.5	5.5287	41.7	5.30292		19.2	4.7432	8.1	3.32326
59.3	3.9577	81.8	7.68613		14.9	5.34743	25.8	4.25982
4.2	7.82477	76.9	6.29562		31	4.38066	64	4.44109
33.1	5.46828	89.5	5.78102		36.2	5.34743	40.3	3.89728
1.4	5.07553	29.1	5.69343		24	4.04834	17.2	4.56193
70.8	3.80665	42.3	6.48175		10.4	4.04834	24.8	4.53172
6.2	5.46828	46	4.92701		0.8	3.20242	4.1	4.71299
70.9	3.92749	55.5	6.04745		7.7	5.07553	67.1	6.64653
40	4.62236	25.8	2.64599		32.1	6.73716	4	6.10272
28.6	5.55891	8.7	6.4635		29.3	5.8006	49.1	5.58912
83.6	4.38066	53.5	4.82482		28.5	5.61934	50.1	7.0997
79.5	5.16616	15.9	6.78467		76.5	6.3142	62	5.2568
82.4	5.22659	40.9	4.77372		1.9	4.71299	37.2	3.92749
74.5	5.01511	50.6	4.33577		76.9	5.5287	77.3	6.16314
2.9	6.85801	34.4	5.34672		64	4.56193	56.7	4.22961
63	3.05136	47.2	5.07299		43.2	4.4713	17.6	4.7432
74.1	5.01511	3.4	7.33212		88.6	5.04532	15.3	5.61934
28	4.53172	43	5.22263		30.1	5.31722	84.1	7.55287
22.6	3.65559	84.7	6.70438		40.4	5.61934	33.2	5.31722
82.5	3.4139	84.4	4.70438		52.6	4.86405	57	5.92145
26	5.28701	81.3	6.52007		73.3	5.8006	48.1	5.46828
10.2	4.65257	61.5	5.88686		50.1	5.70997	27	5.8006
64.6	3.59517	68.5	6.30657		40.1	5.74018	75.5	5.95166
5	4.68278	59.2	5.01825		35.5	8.9426	47.3	6.25378
2.2	2.41692	38.3	5.70803		67.5	6.70695	72.4	5.40785
36.3	5.43807	82.1	4.66058		45.6	6.5861	86.8	5.64955
7.7	6.49547	37.4	6.07664		33	6.61631	17.1	5.74018
15.1	4.22961	61.3	7.16058		82.4	6.37462	53.8	5.07553
67.4	4.16918	12.2	5.86131		62.9	7.28097	21.4	4.92447
87.6	5.16616	52.4	4.69343		63.1	6.0423	88.1	7.49245
23.9	3.71601	51.8	6.58759		36.2	5.92145	39.5	10.8157
0.5	4.56193	31.7	6.32847		25.5	6.37462	1.4	7.55287
32.8	3.77644	88.5	4.45255		60	5.95166	83.4	6.97885
37.2	4.95468	57.7	6.21168		74.7	7.0997	59.8	5.70997
63.7	3.29305	46.3	7.27737		74.6	6.19335	41.7	6.0423
12.2	4.35045	61.3	5.64234		65.6	4.53172	16.4	5.83082
75.5	5.46828	85.5	6.08759		37.6	5.40785	0.5	6.49547
34	3.14199	82.5	4.86496		31.4	6.13293	19.4	5.86103
54	3.6858	60.2	5.60949		27.7	7.43202	58.7	5.58912
52	3.98792	22.9	3.94161		87.6	5.5287	18	5.64955
44.4	3.11178	9.3	5.75547		45.8	6.37462	29.9	7.40181
23.5	4.83384	6.3	4.93431		36.3	6.40483	63	5.86103
2.3	4.59215	55.5	6.12044		38.7	5.28701	59.8	6.22356
78.6	3.53474	33.3	4.73723		46.9	6.40483	56.3	5.86103
51	5.2568	28.8	5.90146		68.7	4.71299	32	4.44109
0.4	3.53474	26.6	3.78467		78.9	6.52568	45	6.19335
72.2	4.65257	80.2	5.68248		52.2	6.43505	23.1	6.5861
35	4.98489	63.6	4.93066		23.6	5.22659	68.8	4.41088
10.7	4.32024	42.5	5.86131		89	4.68278	79.9	7.73414
45.9	2.71903	56.1	6.76277		63.3	6.34441	62.9	7.40181
9.2	5.04532	33.4	6.45985		77.5	4.7432	65.2	5.28701
0.3	4.32024	68.7	4.4708		89.2	6.13293	33.7	5.89124
60.8	4.32024	56.1	3.9927		45.6	7.19033	69.3	8.24773
42.3	4.1994	40.4	6.44161		52.4	7.00906	33.9	5.95166
70.2	3.77644	60.4	7.24818		82.6	5.58912	72.8	5.67976
84.3	4.92447	59.5	7.08394		20.6	5.92145	73.2	5.77039
71.3	4.10876	16.3	7.39051		22	6.85801	10.1	5.55891
46.8	5.86103	7.6	4.36496		85	5.10574	69.5	5.40785
10.9	4.32024	56.3	5.89781		19.2	5.10574	23.8	5.5287
32.6	2.71903	50.7	4.87956		28.5	6.94864	3.3	5.43807
64	4.68278	39.4	5.83212		39.9	5.31722	13.1	7.0997
59.2	3.4139	27.3	3.16788		71.9	6.22356	51	4.95468
65.7	4.89426	54.3	4.13139		86.6	5.89124	73.1	5.49849
77.2	4.56193	32.7	6.35036		61.3	5.77039	53.3	6.85801
47.9	4.13897	41.1	6.05474		77.9	6.97885	7	6.0423
48.3	2.83988	66.2	6.43796		39.4	6.34441	3.6	6.01208
30.2	4.38066	76.2	8.43066		17.7	5.70997	0.4	6.61631
69.7	4.1994	50.9	6.05839		51.1	6.19335	57.3	6.5861
0.9	4.04834	13.9	6.09854		61.2	6.55589	18.9	6.34441
63.6	4.29003	68.4	7.71168		8.6	5.37764	82.3	9.78852
83.1	4.95468	57.2	5.36496		11.3	6.70695	77.1	7.82477
83.2	5.19637	65.7	7.32482		59.7	7.0997	24.6	7.28097
17.8	4.59215	77.5	5.65693		55.2	4.4713	75	8.30816
10.8	3.89728	90	5.77737		4.9	5.74018	62.7	6.79758
50.9	4.86405	79.3	7.08759		74.4	5.43807	68.4	8.18731
42.8	4.89426	27.5	3.66058		40.3	6.28399	64.7	9.27492
23.6	4.22961	29.7	4.10949		21.8	6.73716	56.9	5.34743
19.8	4.92447	40.8	4.43796		87.1	6.43505	23.4	6.10272
89.1	5.55891	39.4	7.16788		80.5	4.83384	22.9	6.64653
13.3	2.99094	53.3	4.63504		30.7	4.38066	59.3	6.16314
17.9	4.10876	57.4	5.03285		21.8	5.55891	66.8	5.89124
86.6	4.35045	49.6	5.4854		40.1	3.74622	40.2	5.67976
89.3	4.86405	87.7	6.44161		53.7	5.61934	75.5	3.77644
60.6	4.95468	41.1	6.09489		0	6.85801	3.5	5.83082
84.8	3.53474	2.2	5.84672		26.6	6.70695	72.2	5.16616
86.6	4.29003	49.5	6.12044		85.1	6.19335	26.4	5.19637
1.5	4.95468	67.2	5.03285		76	5.31722	10.2	4.62236
63.2	4.16918	14.8	3.71898		23.3	6.64653	9.7	5.28701
57.6	3.89728	45.5	6.32847		26.4	6.34441
61.5	4.80363	39.4	5.49635		8.3	3.83686
78.9	4.95468	71.6	6.58759		70.2	5.98187
59.5	4.35045	50	7.54015		61.7	6.67674
58.3	3.77644	69.7	6.58029
51.9	3.89728	44.5	6.45255
53.8	5.01511	58.5	4.69708
5.9	4.59215	70.8	6.90876
24.6	4.29003	85.6	6.86496
64.8	4.80363	27.8	6.92336
27.6	5.19637	15.4	6.63869
7.1	4.68278	49.4	6.28102
9.6	3.86707	76	7.62044
65.8	4.65257	22.9	5.93066
8.3	4.65257	66.6	8.75912
3.9	6.34441	1.3	4.02555
77.3	6.0423	28.1	6.37226
29.2	3.86707	46	7.33212
6.3	3.6858	82.8	8.26277
59	3.44411	69.2	7.24818
71.4	4.77341	40.6	3.5219
76.2	5.16616	4.5	5.41241
46.9	4.32024	24	4.62044
58.7	4.50151	29.4	5.79562
27.5	5.28701	66.8	6.34672
6.1	4.29003	45.4	5.22628
29.3	4.32024	43.3	6.43431
61.3	4.25982	75.8	5.28467
75.1	3.98792	63.7	6.9854
16.4	2.99094	24.4	6.39781
25.9	5.19637	58.7	6.59854
64.5	4.4713	29.8	6.20073
81.4	5.40785	57.6	7.22628
11.7	4.22961	66.6	2.88321
25.1	4.07855	85.3	6.4635
74.9	4.07855	34.8	7.44526
84.3	4.16918	13.4	5.9854
86.3	3.71601	49	5.72993
3.5	3.65559	4.2	5.18248
0.8	3.92749	6.8	6.13139
83.6	4.62236	48.5	5.58394
36.9	4.89426	45.5	3.39416
0.5	4.38066	58.1	5.14599
29.5	4.16918	71.1	6.9708
37.4	4.10876	42	7.73723
86.7	4.95468	6.3	6.71533
11.3	4.80363	82.6	8.86861
39.7	3.89728	67.1	3.94161
17.5	5.13595	60.6	6.53285
80.1	4.80363	81.8	4.81752
61.4	3.71601	0.1	6.13139
10	4.35045	88.8	3.75912
19.7	4.29003	88.2	6.09489
44.3	3.77644	34	5.07299
7.2	4.95468	27.8	4.48905
49.9	4.7432	80.1	6.27737
2.4	5.43807	75.5	6.27737
38.8	5.31722	30.3	4.59854
76.7	4.56193	50.9	3.39416
		12.2	5.62044
		7.5	5.65693
		29	6.20438
