# Supplementary material for: 27 T ultra-high static magnetic field changes orientation and morphology of mitotic spindles in human cells
Source: eLife. 2017 Feb 28;6:e22911. doi: 10.7554/eLife.22911 (PMC5370190; doi:10.7554/eLife.22911)
Supplement: Figure 7—source data 3. — This is the source data for Figure 7F. DOI: http://dx.doi.org/10.7554/eLife.22911.032 [file elife-22911-fig7-data3.xlsx]

## Sheet: Figure 7F
CNE-2Z (a/w)
Sham		27 T
c/d<1.3	c/d>1.3	c/d<1.3	c/d>1.3
1.04902	1.86992	1.86967	1.82524
2.0734	1.13725	1.31115	1.09402
1.58333	1.30675	1.44459	0.929718
1.82906	1.10145	1.42656	0.795318
1.48315	1.31387	1.24619	0.846494
1.43478	1.27528	1.4581	0.850425
1.27485	1.21341	1.63391	1.27158
1.10063	1.22917	1.25112	0.897793
1.52212	1.12805	0.905566	1.13636
1.29078	1.2905	1.11377	1.10899
1.25	1.41549	1.30954	1.08721
1.30058	1.02174	0.993563	1.21953
1.69504		1.37879	0.988074
1.47586		1.97488	0.782362
			0.842785
			0.696044
			0.711934
