# Supplementary material for: 27 T ultra-high static magnetic field changes orientation and morphology of mitotic spindles in human cells
Source: eLife journal article supplement (doi:10.7554/elife.22911), 2017-02-28
Supplement: supp [file elife_poa_e22911_Revised_Manuscript_with_tracked_changes.docx]

**27 T Ultra-high Static Magnetic Field Changes Orientation and Morphology of Mitotic Spindles in Human Cells**

Lei Zhang1,2, #, Yubin Hou1, #, Zhiyuan Li1, Xinmiao Ji1, Ze Wang1,2, Huizhen Wang1,2, Xiaofei Tian1,2, Fazhi Yu2, Zhenye Yang2, Li Pi1,2,Timothy J. Mitchison3,*, Qingyou Lu1,2, 4*, Xin Zhang1*

1High Magnetic Field Laboratory, Chinese Academy of Sciences, Hefei, Anhui, 230031, P. R. China;

2University of Science and Technology of China, Hefei 230026, China;

3Department of Systems Biology, Harvard Medical School, Boston, MA, 02115, USA;

4Collaborative Innovation Center of Advanced Microstructure, Nanjing University, Nanjing, Jiangsu 210093, People’s Republic of China

# These authors contributed equally to this work.

*To whom correspondence should be addressed: Xin Zhang, [xinzhang@hmfl.ac.cn](mailto:xinzhang@hmfl.ac.cn); Qingyou Lu, [qxl@ustc.edu.cn; Timothy](mailto:qxl@ustc.edu.cn;%20Timothy) J. Mitchison [timothy_mitchison@hms.harvard.edu](mailto:timothy_mitchison@hms.harvard.edu)

**Abstract**

Purified microtubules have been shown to align along the static magnetic field (SMF) in vitro because of their diamagnetic anisotropy. However, whether mitotic spindle in cells can be aligned by magnetic field has not been experimentally proved. In particular, the biological effects of SMF of above 20 T (Tesla) have never been reported. Here we found that in both CNE-2Z and RPE1 human cells spindle orients in 27 T SMF. The direction of spindle alignment depended on the extent to which chromosomes were aligned to form a planar metaphase plate. Our results show that the magnetic torque acts on both microtubules and chromosomes, and the preferred direction of spindle alignment relative to the field depends more on chromosome alignment than microtubules. In addition, spindle morphology was also perturbed by 27 T SMF. This is the first reported study that investigated the cellular responses to ultra-high magnetic field of above 20 T. Our study not only found that ultra-high magnetic field can change the orientation and morphology of mitotic spindles, but also provided a tool to probe the role of spindle orientation and perturbation in developmental and cancer biology.

**Key words:** static magnetic field (SMF); ultra-high magnetic field; mitotic spindle; spindle orientation; chromosome alignment.

**Introduction**

The mitotic spindle is a highly dynamic microtubule assembly responsible for chromosome segregation and cleavage furrow positioning during cell division. Spindle orientation is central to cell fate determination and tissue architecture, and mounting evidences show that astral microtubules, multiple cortical proteins and their interactions with plasma membrane are all critical to achieve correct orientation ([Toyoshima et al. 2007](#_ENREF_35), [Lancaster and Knoblich 2012](#_ENREF_12), [Lu and Johnston 2013](#_ENREF_15), [Bergstralh and St Johnston 2014](#_ENREF_1), [Nestor-Bergmann et al. 2014](#_ENREF_21)). Tissues may have additional control mechanisms to minimize spindle orientation errors, such as apoptosis in the wing disc ([Bergstralh and St Johnston 2014](#_ENREF_1)). The connection between spindle orientation and tumorigenesis has also been an active field in recent years ([Gonzalez 2007](#_ENREF_9), [Knoblich 2010](#_ENREF_11), [Pease and Tirnauer 2011](#_ENREF_24)).

Most biological materials are diamagnetic, such as proteins, DNA and lipids. SMFs can align large biological objects that have diamagnetic anisotropy, such as microtubule polymers and nucleic acid chains, as well as some types of cells and organisms ([Maret and Dransfeld 1977](#_ENREF_18), [Torbet and Ronziere 1984](#_ENREF_34), [Higashi et al. 1993](#_ENREF_10), [Emura et al. 2001](#_ENREF_7), [Takeuchi et al. 2002](#_ENREF_31), [Teodori et al. 2006](#_ENREF_32), [Stern-Straeter et al. 2011](#_ENREF_29)). The degree of alignment with the externally applied magnetic field is proportional to the product of the molecular magnetic susceptibility and the magnetic field strength. For proteins, the diamagnetic anisotropy is mainly due to the alpha helix, beta sheet and aromatic rings ([Chabre 1978](#_ENREF_4), [Worcester 1978](#_ENREF_45), [Pauling 1979](#_ENREF_23)). Even individual peptide bonds, which have weak diamagnetic anisotropy can contribute when linked together in a fixed and organized orientation in alpha helix or beta sheet. Most proteins have very weak diamagnetic anisotropy, but their response to a magnetic field can be amplified by ordered polymerization, as in microtubules, where the additive diamagnetic anisotropy can be significant. The DNA chain is another example of a biopolymer with relatively large diamagnetic anisotropy ([Maret et al. 1975](#_ENREF_19)), mainly due to its stacked aromatic bases. Theoretical predictions suggested that mitotic chromosome arms, where DNA is highly compacted, might generate electromagnetic fields along the chromosome arm direction ([Zhao and Zhan 2012](#_ENREF_48)) and, less speculatively, that chromosomes should be fully aligned by SMFs of around 1.4 T ([Maret 1990](#_ENREF_17)).

Mitotic spindles comprise both microtubules and chromosomes, but most studies of their potential response to magnetic fields have focused on microtubules. Multiple studies have shown that purified microtubules can be aligned by moderate and high SMFs and the alignment effect increases significantly with magnetic field strength ([Vassilev et al. 1982](#_ENREF_42), [Bras et al. 1998](#_ENREF_2), [Glade and Tabony 2005](#_ENREF_8)). This is due to the diamagnetic anisotropy of tubulin and microtubules ([Bras et al. 2014](#_ENREF_3)). In addition, tubulin assembly *in vitro* was disordered by a 10-100 nT hypogeomagnetic field (natural geomagnetic field is usually around 50000 nT/0.5 Gauss) ([Wang et al. 2008](#_ENREF_43)). However, whether SMF can change the mitotic spindle orientation in a cell has never been reported. Denegre et al found that 16.7 T large gradient SMFs can affect the division orientation of Xenopus eggs ([Denegre et al. 1998](#_ENREF_5)). They proposed that SMF may affect the orientation of astral microtubules and/or spindles, which was theoretically proved later by Valles ([Valles 2002](#_ENREF_39)), but no experimental evidence has been provided so far to prove this hypothesis. Although the importance of aster microtubules in spindle orientation determination in some types of cells is well known ([Palmer et al. 1992](#_ENREF_22), [Shaw et al. 1997](#_ENREF_28)), the metaphase spindles still can orient themselves parallel to the substrate in the absence of aster microtubules in both Madin-Darby Canine Kidney (MDCK) and human cervical cancer HeLa cells ([Lazaro-Dieguez et al. 2015](#_ENREF_13)). In addition, the spindle orientation is controlled by multiple signaling proteins, microtubules and associated proteins, and actin and associated proteins ([Toyoshima and Nishida 2007](#_ENREF_36), [Toyoshima and Nishida 2007](#_ENREF_37), [Woolner et al. 2008](#_ENREF_44), [Thaiparambil et al. 2012](#_ENREF_33)). Although a few reports in recent years showed that the microtubule and actin cytoskeleton in interphase cells could be affected by 7-17 T ultra-high SMFs in some cell types ([Valiron et al. 2005](#_ENREF_38)), information about the mitotic spindle was not provided. Therefore, the theoretical prediction of the SMF effect on spindle orientation in cells has not been experimentally tested.

In our previous study, we found that prolonged treatment of 1 T moderate intensity SMF can cause multipolar spindles in cells ([Luo et al. 2016](#_ENREF_16)) and we predict that stronger SMFs are likely to produce more obvious effects on spindles. To accommodate cells in the ultra-high field magnet we constructed a custom cell incubation system using two sample holders that fit inside the new 32 mm bore ultra-high field magnets in the Chinese High Magnetic Field Laboratory (CHMFL, China). This platform provides accurate temperature and gas control for animal and human cells as well as some small model animals.

**Materials and Methods**

**Materials**

The 18 mm cell culture plates were custom made by Guangzhou Jet Bio-Filtration Company, China. The antibody for β-tubulin (#HC101) was from Beijing TransGen Biotech. The Alexa Fluor 488 and 594 Phalloidin, secondary antibodies for immunofluorescence and anti-fade ProLong Gold with DAPI were all from Invitrogen. The 1 T magnets (Neodymium magnet, N38, dimension of 5 cm x 5 cm x 5 cm) were from China Dafeng Zhongxin Permanent Magnet Material. The CENP-E inhibitor (GSK923295, # S7090) was from Selleck. FITC-Annexin V Apoptosis Detection Kit was from BD PharmingenTM.

To investigate the biological effect of the magnetic field provided by The WM4 (Figure 1A), we designed (Figure 1B) and constructed a set of biological sample incubation system (Figure 1C, and Figure 1-figure supplement 1), with accurate temperature, gas and humidity control. with

the experimental group Although the maximal magnetic field intensity that WM4 can reach is 27.5 T, here we used 27 T to ensure the stability during the whole experiment process

The biological sample incubation system we constructed can hold samples up to 18 mm in diameter and incubate at temperature range of 4-100 degree. We custom made small plates to fit in this biological sample incubation system. Most experiments in this study were carried out in these custom made 18 mm plates, including full size incubator control, sham control and the 27 T experimental groups. Since the gas, humidity and temperature can all be well controlled, the platform we built is suitable to study a wide range of biological samples, such as various cell cultures, small model animals such as fruit flies, C elegans, zebrafish and mouse tissues.

**Cell culture**

CNE-2Z cells were cultured in RPMI-1640 (#10-040-CVR, CORNING Life Sciences) supplemented with 10 % FBS and 1 % P/S (penicillin/streptomycin). RPE1 cells were maintained in DMEM (#10-017-CV, CORNING Life Sciences) supplemented with 10 % FBS and 1 % P/S. Both cells were maintained in cell incubator with 5% CO2, at 37 ℃.

**Immunofluorescence**

CNE-2Z and RPE1 cells were placed on coverslips in 18 mm or 24-well plates/35mm cell culture plates and treated with 27 T, 1 T or 9 T magnetic fields. Cells were washed once with PBS and fixed by 4 % (vol/vol) formaldehyde at room temperature for 20 minutes. Then the coverslips were washed with TBS-Tx (TBS supplemented with 0.1% Triton X-100) and blocked by AbDil-Tx (TBS-Tx with 2% (wt/vol) BSA and 0.05% sodium azide) at room temperature for at least 30 minutes. Coverslips were stained with anti-β-tubulin antibody at room temperature for 2 hours, followed by fluorescently conjugated secondary antibodies at room temperature for 1 hour. Then the cells were directly stained with fluorescently labeled Phalloidin for 1 hour at room temperature. After washing with TBS-Tx, coverslips were mounted in anti-fade ProLong Gold mounting medium with DAPI (Invitrogen). The antibodies and reagents used in immunofluorescence experiments include β-tubulin (used at 1:1000 dilution), the secondary fluorescently conjugated antibodies (used at 1:250 dilution), as well as Alexa 488 or 594 Phalloidin (used at 1:40 dilution).

**Cell counting and cell cycle analysis**

All attached and floating cells were collected for cell counting, apoptosis and cell cycle analysis. Bright field images were taken before the cells were harvested by trypsinization. An aliquot of the cells were counted by hemocytometer and the rest cells were used for flow cytometry analysis (cell death and cell cycle). Experiments were repeated for at least three independent times by two researchers. The results were gathered together for analysis.

Cells were trypsinized and washed three times with PBS before they were fixed in 70% ice-cold ethanol overnight at 4 °C. Then they were washed with PBS again, and incubated in PI (propidium iodide) solution (BD Pharmingen) for 30 min in the dark at room temperature. Samples were then analyzed on a BD Flow Cytometry (BD bioscience, Calibur). 1 × 104 cells per sample were collected for each condition. Data were analyzed by ModFit LT. Experiments were done for at least three times.

**Apoptosis assay**

Cells were trypsinized and washed twice with ice-cold PBS before they were resuspended in binding buffer at 1 × 106 cells/ml. Then 100 μl of them was transferred to a 1.5-ml culture tube. FITC-Annexin V (5 μl) and PI (5 μl) were added to the tube, mixed, and incubated for 15 min at room temperature in the dark. Then 400 μl of binding buffer was added to the stained cells and mixed before they were analyzed by flow cytometry within 1 h. Approximately 1 × 104 cells were collected by flow cytometer. Data were analyzed by FlowJo. Experiments were done for at least three times and representative results were shown in the figures.

**Microscopy**

The bright field images were taken by a DSZ2000 microscope equipped with ISH300 3.0MP camera (UOP). Most Immunofluorescence images shown in the figures were using a DeltaVision microscope (GE Healthcare) equipped with a 60× objective lens, 0.5 μm step size. Deconvolved images were projected into a single picture using Image J software and maximum projection images are shown in the figures. Some low magnifications immunofluorescence images were taken by a Leica DMI4000B microscope for spindle measurement.

**Magnetic field exposure**

Cells were plated on round or pre-cut coverslips one night before to allow the cells to attach. They were then exposed to different magnetic fields for indicated time points.andawere used to analyze

For 0.05 T and 1 T magnetic field exposure, CNE-2Z cells on coverslips were exposed to magnetic fields for 4 hours, 3 days or 7 days in regular full-sized CO2 cell incubator (Shanghai Boxun, BC-J160S) that has accurate control of temperature (37℃), humidity and CO2 (5%). The cell plates were placed right on the top center of the magnets (Neodymium magnet N38, dimension: 5 cm x 5 cm x 5 cm) and the magnetic field intensity measured by a Gauss meter (LakeShore 475 DSP Gaussmeter) showed the magnetic field intensity of 1.07 T (10700 Gs) for the 1 T magnet. The sham control group was in the same incubator, around 30-40 cm away from the magnets, where the magnetic field is 0.925 Gs (background magnetic field in the lab was measured to be 0.875± 0.171 Gs and in a separate CO2 cell incubator with no magnets was 0.875± 0.096 Gs).

For 9 T magnetic field (upward direction) exposure perpendicular to coverslips, 2 ml 5 x 105 cells /ml (4 hours assay) or 2 ml 1.25 x 105 cells /ml (3 days assay) CNE-2Z cells were placed on coverslips in each 35 mm cell culture plates one night ahead to allow the cells to attach. On the second day, they were placed in 5% CO2 at 37 ℃ under 9 T SMF for 4 hours (3 hours stable maintenance at 9 T with half hour increase and half hour decrease ) or 3 days before they were fixed and stained for analysis.

For 27 T magnetic field exposure perpendicular to coverslips, 400 μl 6.25 x 105/mlCNE-2Z cells were placed on coverslips in each 18 mm cell culture plates one night ahead to allow the cells to attach. On the second day, they were placed in regular full-sized cell incubator (Control group) or in two high magnetic field biological sample incubation systems. One was used as Sham group and the other was 27 T group. Then the 27 T group was placed in the center of the 27 T water-cooled magnet (WM4) and the whole cell culture plate was exposed homogeneously to the 27 T magnetic field for 4 hours in total (increasing field for 30 minutes, constant 27 T field for 3 hours and reducing field for 30 minutes). For the 3 days post-exposure experiments, cells taken out of the magnet were then maintained in regular full-sized cell incubator for another 3 days before they were taken out and subjected to further analyses. The sham group was processed identically.

For 1 T, 9 T or 27 T magnetic field exposure parallel to coverslips, coverslips were cut in half using a glass cutter and 1 x 107 CNE-2Z or RPE1 cells were plated in 100 mm plate one night ahead to allow the cells to attach. On the second day, the half coverslips were inserted vertically into the agarose gel pre-plated and solidified on the bottom of 35 mm (1 T and 9 T groups) or 18 mm (27 T group) plates. 1 ml (0.05 T, 1 T and 9 T groups) or 400 μl (27 T group) 1.5% agarose was used for each plate. They were placed in regular full-sized cell incubator (Control group), in 1 T, 9 T magnetic field or in two high magnetic field biological sample incubation systems. One was Sham group and the other was 27 T group. The rest of the experiment was identical to the above mentioned experiments.

**Spindle Measurement**

To measure the spindle angles with the coverslips (lateral or non-lateral) in Figure 3-4, we used the Leica DMI4000B fluorescent microscope and observed the spindle poles under the 100 x objective lens. We consider the spindle lateral with the coverslips if the two poles of spindle apparatus were on one focal plane. When the two poles were not on one focal plane, we defined it as “non-lateral” with the coverslips.

To measure the spindle orientation when they were exposed to 27 T magnetic fields that were parallel to the coverslips in Figure 5-7, we used the Leica DMI4000B fluorescent microscope to get low magnification images. Then we used the Picpick software to measure the angles between spindle long axis and the magnetic field lines on these images for Figure 5 as well as the spindle pole angles in Figure 7C.

The spindle length, width, chromosome distribution, metaphase plate width and the angles between spindle long axis and the magnetic field lines in Figures 6 and 7 were measured by Adobe Photoshop. Spindles dimension and chromosome distributions were measured from 4 independent coverslips of CNE-2Z cells and 4 independent coverslips of RPE1 cells that were treated with RO-3306 and CENP-E inhibitors from two independent days.

**Cell synchronization**

RPE1 and CNE-2Z cells were plated onto the pre-cut coverslips 24 h prior to the assay. Cells were then treated with RO-3306 (10 μM) for 21 h to arrest cells at late G2 phase. After washing with warm PBS for three times, cells were subsequently treated with MG-132 (20 μM) or CENP-E inhibitor (GSK923295, 1 μM) for another 6 h to arrest cells in metaphase or to produce misaligned chromosomes. Magnetic field was applied during the last 4 h.

**Statistics**

For quantifications in the manuscript, cells and spindles were counted for each condition from at least three to four independent coverslips or cell culture plates. Comparisons between treatments were analyzed by a two-tailed Student t test. P values are labeled in the figures for where data were compared.

**Results**

The WM4 magnet we use (Figure 1A) provides vertical ultra-high homogenous SMF at the center of the magnet. The magnetic field direction is upward. Bright field microscopic observation and flow cytometry did not reveal obvious changes of cell morphology or cell death after 4 h of 27 T SMF exposure in human nasopharyngeal carcinoma CNE-2Z cell (Figure 2A-D). Moreover, immunostaining analysis did not reveal obvious microtubule or actin cytoskeleton abnormalities in interphase cells after 4 h of 27 T exposure (Figure 2E) either. Therefore 27 T SMF treatment for 4 h is not acutely toxic to CNE-2Z cells. In addition, we found that the cell morphology was not obviously changed (Figure 2-figure supplement 1A) three days post exposure but the cell number decreased by ~40% (Figure 2-figure supplement 1B). Flow cytometry analysis showed that the cell cycle was only slightly changed (Figure 2-figure supplement 1C) while the cell death was not obviously affected (Figure 2-figure supplement 1D).

**27 T SMF changes spindle orientation**

Tubulin and microtubules has been shown to have diamagnetic anisotropy and purified microtubules can align along the magnetic field *in vitro*. However, the spindle orientation after strong SMF exposure had never been experimentally investigated. Using immunofluorescence analysis of cells fixed immediately after they were taken out of the magnet, we found that mitotic spindle orientation was perturbed by 27 T SMF (Figure 3A). In sham incubated or control cells, the mitotic spindle axis is usually parallel to the tissue culture plate or coverslip (“lateral”) while the 27 T magnetic fields increased the percentage of spindles that were not parallel to the coverslip (“non-lateral”) (Figure 3A, B). We separately measured metaphase spindles (Figure 3C) as well as prometaphase and metaphase spindles together (Figure 3-figure supplement 1) and both results showed that non-lateral spindles were increased by 27 T SMF. We also examined lower magnetic field intensities for their effect on spindle orientation. The 0.05 T and 1 T SMF were provided by permanent magnets placed in regular incubators (Figure 4A). We found that 4 hour exposure does not increase the non-lateral spindles (Figure 4B) as 27 T SMF. We also tested 9 T SMF provided by a superconducting magnet ([Zhang et al. 2016](#_ENREF_46)) and found that 4 hour of 9 T exposure does not increase the non-lateral spindles either (Figure 4C). However, although exposure for a prolonged time of 3 days to 0.05 T or 1 T SMFs still had no effect (Figure 4D), 9 T SMF could perturb spindle orientation (Figure 4E). In contrast, 0.05 T and 1 T SMFs had no effect on spindle orientation even after 7 days of exposure (Figure 4F). Therefore the effect of SMF on spindle orientation was field intensity-dependent and time-dependent. Ultra-high SMF of 27T could change spindle orientation in 4 hours but 9 T SMF need 3 days to show effects.

**Spindle orientation reflects magnetic torques on chromosomes more than microtubules**

Both microtubules and chromatin exhibit diamagnetic anisotropy, but prior work about spindle orientation has only assumed microtubules are the target of strong magnetic fields and did not considered the chromatin. As a start to distinguish these effects, we aligned coverslips in the same axis as the magnetic field direction, so the field should only change orientation in the plane of the coverslip (Figure 5A-C). We also added another non-transformed human retinal pigment epithelial cell line RPE1 to the experiment to see whether the effects we observed are cell specific (Figure 5C). Synchronization was also used to enrich mitotic cells (Figure 5-figure supplement 1). We grouped the spindles into three different groups based on their orientation relative to the field direction: parallel with the magnetic field, normal to the magnetic field and other (Figure 5D). Interestingly, spindle orientation was different in prometaphase cells vs. metaphase cells (Figure 5E). In the 27 T SMF treated group, prometaphase cells tended to orient with their spindle long axis in parallel with the field direction, while metaphase cells tended to orient with the spindle long axis normal to the field direction (Figure 5E). Synchronized and unsynchronized cells responded similarly (Figure 5-figure supplement 2A, B) so we combined data from both synchronized and unsynchronized cells for statistical analysis. As shown in Figures. 5F and 5G, 27 T SMF had similar orientation effects on CNE-2Z and RPE1 spindles. Figure 5-figure supplement 3 shows the Cosinus of spindle angle. The main difference between cells in prometaphase and metaphase is the organization of chromosomes, which are distributed in prometaphase and tightly aligned in metaphase. We suspect this difference accounts for the differential response to magnetic fields.

To further investigate the relative contribution of chromosomes vs microtubules in spindle orientation, we used a CENP E inhibitor to disrupt metaphase chromosome alignment without damaging the bipolar spindle (Figure 6A). In this drug, many mitotic cells exhibited highly disorganized chromosomes (Figure 6B). Then we measured the spindle length, chromosome distribution, metaphase plate width (Figure 6C) as well as the angle between spindle long axis and the magnetic field/gravity direction in Adobe Photoshop. After quantifying four independent coverslips for both CNE-2Z and RPE1 cells, we found that the chromosome distribution in spindles seemed to affect the angle between spindle long axis and the magnetic field/gravity direction (Figure 6D and Figure 6-figure supplement 1). The preferred spindle orientation relative to the field differed between cells that have well aligned chromosomes and misaligned chromosomes, and that this difference was significant (p< 0.01 in RPE1 cells and p< 0.05 in CNE-2Z cells) (Figure 6E, F). This indicates that chromosomes play a major role in spindle orientation in response to SMFs. Spindles with misaligned chromosomes tend to align with the spindle long axis in parallel with the field direction while spindles with well aligned chromosomes tend to align their metaphase plate in parallel with the field direction (Figure 6G). Not surprisingly, lower magnetic fields of 1 T or 9 T did not affect the spindle orientation (Figure 6-figure supplement 2).

**Magnetic torque on spindles affects spindle morphology**

We also noted that spindles aligned normal to the magnetic field direction were wider than those parallel to the field direction (Figure 7A). We carefully compared it in control and 27 T SMF treated cells (Figure 7B). In both synchronized and unsynchronized CNE-2Z and RPE1 cells, the spindles in 27 T SMF-treated cells that were normal to the field direction has bigger spindle pole angles, which makes them look “wider” (Figure 7C and Figure 7-figure supplement 1) compare to the ones parallel to the field direction. In control cells that were not treated with SMFs, the spindle pole angles are similar in both directions (Figure 7C). To get a more quantitative measurement, we quantified the spindle length (a) and width (w) and found that the spindle length was not much affected by the 27 T magnetic field (Figure 7-figure supplement 2A, B) but the spindle width was increased in both CNE-2Z and RPE1 cells, when the spindle was normal to the field direction (Figure 7D and Figure 7-figure supplement 2C, D), which confirms that the spindle is “wider”.

To find out whether chromosome alignment affected the spindle morphology change in the presence of 27 T field, we analyzed the spindle dimension and chromosome distribution (Figure 7E) for CENP-E inhibitor treated spindles that are normal to the field direction (the angle between spindle long axis to the magnetic field direction within 80-90 degree). It is interesting that the chromosome alignment or misalignment did actually affect the spindle ellipticity (Figure 7F). Our results show that spindles with well aligned chromosomes became obviously wider in 27 T (p<0.005), but the morphology of spindles with misaligned chromosomes was not much affected (Figure 7F). We also noticed that spindles with well aligned chromosomes themselves are slightly wider in the sham control group compared to spindles with misaligned chromosomes (Figure 7F), which may have their microtubules relative easier to be aligned by a vertical magnetic field.

**Discussion**

We propose that the SMF-induced spindle orientation and morphology changes are due to the combined alignment effects of both microtubules and chromosomes in the magnetic field (Figure 8). When the field is oriented normal to the substrate, magnetic torques on both microtubules and chromatin may combine to re-orient spindles away from the surface plane, opposing torques on astral microtubules that promote the normal orientation. Application of the magnetic field parallel to the coverslip allowed us to discriminate torques on chromatin vs microtubules, and in this case it appears that torques on well aligned chromatin dominated, aligning spindles preferentially with their microtubules normal to the field, and their metaphase plate parallel to the field (Figures 5 and 6). Our result is opposite to that proposed by Denegre et al, who studied Xenopus egg cleavage in 16.7 T high magnetic fields and theoretically proposed that the orientation of spindle in magnetic field is a result of the balance between aster microtubules and spindle microtubules ([Denegre et al. 1998](#_ENREF_5)). They did not directly image spindles, but we note opposite results in the two systems might depend on huge size-scaling differences between the two systems we used. The cleavage plane in Xenopus eggs is oriented by huge microtubule asters with almost mm dimensions, while the amount of chromatin is the same as a mitotic cell. In contrast, the ratio of chromatin to microtubules is much larger in human somatic cells. Theoretical calculation predicted that the highly compacted mitotic chromosomes could be fully aligned by magnetic fields at around 1.4 T ([Maret 1990](#_ENREF_17)). Therefore the metaphase plate composed of chromosomes likely dominated the SMF-induced orientation in normal-sized somatic cells.

This is the first reported study that investigated the cellular responses in ultra-high magnetic field of above 20 T. The torque of a substance is equal to the product of magnetic field intensity and the magnetic susceptibility of the object, in which the susceptibility could also be field-dependent and can be Taylor expanded. This means that the torque could be parabolically proportional to the magnetic field strength. Thus, a high field has much more severe impact than a low field as far as field-induced alignment is concerned, and the relationship is not linear. Although there are various potential concerns for the safety issue of the high magnetic fields, the known biological effects of high field of above 10 T are limited. There are only a few studies that have investigated the animal or human cells at ≥10 T. Nakahara et al and Zhao et al showed that 10 T or 13 T SMFs did not have obvious effects on the human-hamster hybrid (*A*L) cells, Chinese Hamster Ovary (CHO) cells or human primary skin fibroblasts (AG1522) cells; Denegre et al found that 16.7 T large gradient SMFs can affect the division of Xenopus eggs, which is presumed to act through astral microtubules and spindles ([Denegre et al. 1998](#_ENREF_5)); the Shang group found that 12-16-12T large gradient SMFs can affect microtubule actin crosslinking factor 1 (MACF1) expression and its association with cytoskeleton ([Qian et al. 2009](#_ENREF_26)) as well as osteoblast ultrastructure and cell viability by disrupting collagen I or Febronectin/1 integrin in human osteoblast-like cell lines ([Qian et al. 2013](#_ENREF_25)); Valiron et al used 17 T, the highest SMF strength applied on cells so far and they did not observe strong cell killing effects ([Valiron et al. 2005](#_ENREF_38)). Instead, they found that the cytoskeleton of interphase mouse embryo fibroblast 3T3 cells and human cervical cancer HeLa cells can be affected by 17 T SMF. Here we found that 27 T SMF does not have an immediate cell killing effects on human CNE-2Z and RPE1 cells but it changes the mitotic spindle orientation and morphology.

The spindle orientation change induced by ultra-high SMF is likely conserved between different cell types, although there may be variations among them. The spindles align with their long axis vertical to the field direction and their metaphase plate parallel to the field direction are different from our prediction. We thought the microtubules within the spindle would align with the magnetic field direction so that the spindle would also align with the field. However, it has been shown that the mitotic chromosomes have electromagnetic properties ([Zhao and Zhan 2012](#_ENREF_48)). Although the chromosomes alignment in the magnetic field has not been experimentally shown, calculation predicted that the chromosomes could be fully aligned with the magnetic field as long as the field is above 1.4 T ([Maret 1990](#_ENREF_17)). Based on theoretical calculation, Valles also proposed that the direction of mitotic spindle alignment in the magnetic field depends on how the diamagnetic anisotropies of its individual components, including microtubules and chromosomes, align within it ([Valles 2002](#_ENREF_39)). Denegre et al’s results about Xenopus egg division shows that the cleavage plane, which is perpendicular to the spindle long axis, tend to parallel with the magnetic field direction ([Denegre et al. 1998](#_ENREF_5)). Xenopus eggs have very different long astral microtubules, which composed a large portion of the whole cell. In contrast, the cells used in our study as well as most human somatic cells have much less astral microtubules and much bigger spindle microtubules compared to Xenopus eggs. Since both astral and spindle microtubules, as well as chromosomes respond to magnetic field, their relative contribution will be critical to determine the final outcome in a given cell type.

In conclusion, although it is well accepted that microtubules can be affected by magnetic fields, the effect of high magnetic field on mitotic spindles in a cell has never been investigated. Here we examined the mitotic spindles in 27 T ultra-high SMF treated human CNE-2Z and RPE1 cells and found that the spindle orientation is indeed affected and the direction is dependent on the chromosome alignment. This provides a powerful tool to study spindle orientation related questions in developmental biology, such as cell fate, tissue architecture, and cancer biology.

**Acknowledgement**

We would like to thank Dr. Yuheng Zhang in the physical division of Chinese High Magnetic Field Laboratory for helpful discussions about the project. This work was supported by the National Key Research and Development Program of China (#2016YFA0400900), National Natural Science Foundation of China (Grant No U1532151), Hefei Science Center CAS (2016HSC-IU007) and Chinese Academy of Sciences “Hundred Talent program” to Xin Zhang, National Natural Science Foundation of China (Grant Nos. 11204306, U1232210, 11374278) to Qingyou Lu and Chinese High Magnetic Field Laboratory facility.

**Author contributions**

X.Z. and Q. L. initiated the project. L.Z. performed most cellular studies and data analysis. Y.H, Z.W. and Q. L. designed and constructed the biological sample system for the magnet. X. J. performed cell cycle and apoptosis assays. H.W. and X.T. performed the low magnetic field assays. Z.L. performed cell synchronization assay. F.Y. and Z.L. provided microscope assistance. L.P. assisted with the ultra-high magnet operation and platform design. T.J.M. designed experiments and edited the manuscript. X. Z. drafted the manuscript and all authors helped edited the manuscript.

**Competing financial interests**

N/A.

**References**

Bergstralh, D. T. and D. St Johnston (2014). "Spindle orientation: What if it goes wrong?" *Semin Cell Dev Biol* **34**: 140-145. DOI:[10.1016/j.semcdb.2014.06.014](https://dx.doi.org/10.1016/j.semcdb.2014.06.014)

Bras, W., G. P. Diakun, J. F. Diaz, G. Maret, H. Kramer, J. Bordas and F. J. Medrano (1998). "The susceptibility of pure tubulin to high magnetic fields: A magnetic birefringence and x-ray fiber diffraction study." *Biophysical Journal* **74**(3): 1509-1521. DOI:[10.1016/S0006-3495(98)77863-4](https://dx.doi.org/10.1016/S0006-3495(98)77863-4)

Bras, W., J. Torbet, G. P. Diakun, G. L. Rikken and J. F. Diaz (2014). "The diamagnetic susceptibility of the tubulin dimer." *J Biophys* **2014**: 985082. DOI:[10.1155/2014/985082](https://dx.doi.org/10.1155/2014/985082)

Chabre, M. (1978). "Diamagnetic Anisotropy and Orientation of Alpha-Helix in Frog Rhodopsin and Meta Ii Intermediate." *Proceedings of the National Academy of Sciences of the United States of America* **75**(11): 5471-5474.

Denegre, J. M., J. M. Valles, K. Lin, W. B. Jordan and K. L. Mowry (1998). "Cleavage planes in frog eggs are altered by strong magnetic fields." *Proceedings of the National Academy of Sciences of the United States of America* **95**(25): 14729-14732.

Emura, R., N. Ashida, T. Higashi and T. Takeuchi (2001). "Orientation of bull sperms in static magnetic fields." *Bioelectromagnetics* **22**(1): 60-65.

Glade, N. and J. Tabony (2005). "Brief exposure to high magnetic fields determines microtubule self-organisation by reaction-diffusion processes." *Biophysical Chemistry* **115**(1): 29-35. DOI:[10.1016/j.bpc.2004.12.048](https://dx.doi.org/10.1016/j.bpc.2004.12.048)

Gonzalez, C. (2007). "Spindle orientation, asymmetric division and tumour suppression in Drosophila stem cells." *Nat Rev Genet* **8**(6): 462-472. DOI:[10.1038/nrg2103](https://dx.doi.org/10.1038/nrg2103)

Higashi, T., A. Yamagishi, T. Takeuchi, N. Kawaguchi, S. Sagawa, S. Onishi and M. Date (1993). "Orientation of Erythrocytes in a Strong Static Magnetic-Field." *Blood* **82**(4): 1328-1334.

Knoblich, J. A. (2010). "Asymmetric cell division: recent developments and their implications for tumour biology." *Nature Reviews Molecular Cell Biology* **11**(12): 849-860. DOI:[10.1038/nrm3010](https://dx.doi.org/10.1038/nrm3010)

Lancaster, M. A. and J. A. Knoblich (2012). "Spindle orientation in mammalian cerebral cortical development." *Curr Opin Neurobiol* **22**(5): 737-746. DOI:[10.1016/j.conb.2012.04.003](https://dx.doi.org/10.1016/j.conb.2012.04.003)

Lazaro-Dieguez, F., I. Ispolatov and A. Musch (2015). "Cell shape impacts on the positioning of the mitotic spindle with respect to the substratum." *Molecular Biology of the Cell* **26**(7): 1286-1295. DOI:[10.1091/mbc.E14-08-1330](https://dx.doi.org/10.1091/mbc.E14-08-1330)

Lu, M. S. and C. A. Johnston (2013). "Molecular pathways regulating mitotic spindle orientation in animal cells." *Development* **140**(9): 1843-1856. DOI:[10.1242/dev.087627](https://dx.doi.org/10.1242/dev.087627)

Luo, Y., X. M. Ji, J. J. Liu, Z. Y. Li, W. C. Wang, W. Chen, J. F. Wang, Q. S. Liu and X. Zhang (2016). "Moderate intensity static magnetic fields affect mitotic spindles and increase the antitumor efficacy of 5-FU and Taxol." *Bioelectrochemistry* **109**: 31-40. DOI:[10.1016/j.bioelechem.2016.01.001](https://dx.doi.org/10.1016/j.bioelechem.2016.01.001)

Maret, G. (1990). "Recent Biophysical Studies in High Magnetic-Fields." *Physica B* **164**(1-2): 205-212.

Maret, G. and K. Dransfeld (1977). "Macromolecules and Membranes in High Magnetic-Fields." *Physica B & C* **86**(Jan-M): 1077-1083.

Maret, G., M. V. Schickfus, A. Mayer and K. Dransfeld (1975). "Orientation of Nucleic-Acids in High Magnetic-Fields." *Physical Review Letters* **35**(6): 397-400.

Nakahara, T., H. Yaguchi, M. Yoshida and J. Miyakoshi (2002). "Effects of exposure of CHO-K1 cells to a 10-T static magnetic field." *Radiology* **224**(3): 817-822. DOI:[10.1148/radiol.2243011300](https://dx.doi.org/10.1148/radiol.2243011300)

Nestor-Bergmann, A., G. Goddard and S. Woolner (2014). "Force and the spindle: mechanical cues in mitotic spindle orientation." *Semin Cell Dev Biol* **34**: 133-139. DOI:[10.1016/j.semcdb.2014.07.008](https://dx.doi.org/10.1016/j.semcdb.2014.07.008)

Palmer, R. E., D. S. Sullivan, T. Huffaker and D. Koshland (1992). "Role of Astral Microtubules and Actin in Spindle Orientation and Migration in the Budding Yeast, Saccharomyces-Cerevisiae." *Journal of Cell Biology* **119**(3): 583-593.

Pauling, L. (1979). "Diamagnetic Anisotropy of the Peptide Group." *Proceedings of the National Academy of Sciences of the United States of America* **76**(5): 2293-2294.

Pease, J. C. and J. S. Tirnauer (2011). "Mitotic spindle misorientation in cancer - out of alignment and into the fire." *Journal of Cell Science* **124**(7): 1007-1016. DOI:[10.1242/jcs.081406](https://dx.doi.org/10.1242/jcs.081406)

Qian, A. R., X. Gao, W. Zhang, J. B. Li, Y. Wang, S. M. Di, L. F. Hu and P. Shang (2013). "Large Gradient High Magnetic Fields Affect Osteoblast Ultrastructure and Function by Disrupting Collagen I or Fibronectin/alpha beta 1 Integrin." *Plos One* **8**(1). DOI:[10.1371/journal.pone.0051036](https://dx.doi.org/10.1371/journal.pone.0051036)

Qian, A. R., L. F. Hu, X. Gao, W. Zhang, S. M. Di, Z. C. Tian, P. F. Yang, D. C. Yin, Y. Y. Weng and P. Shang (2009). "Large Gradient High Magnetic Field Affects the Association of MACF1 With Actin and Microtubule Cytoskeleton." *Bioelectromagnetics* **30**(7): 545-555. DOI: [10.1002/bem.20511](https://dx.doi.org/10.1002/bem.20511)

Schepkin, V. D., W. W. Brey, P. L. Gor'kov and S. C. Grant (2010). "Initial in vivo rodent sodium and proton MR imaging at 21.1 T." *Magnetic Resonance Imaging* **28**(3): 400-407. DOI:[10.1016/j.mri.2009.10.002](https://dx.doi.org/10.1016/j.mri.2009.10.002)

Shaw, S. L., E. Yeh, P. Maddox, E. D. Salmon and K. Bloom (1997). "Astral microtubule dynamics in yeast: A microtubule-based searching mechanism for spindle orientation and nuclear migration into the bud." *Journal of Cell Biology* **139**(4): 985-994.

Stern-Straeter, J., G. A. Bonaterra, S. S. Kassner, A. Faber, A. Sauter, J. D. Schulz, K. Hormann, R. Kinscherf and U. R. Goessler (2011). "Impact of static magnetic fields on human myoblast cell cultures." *Int J Mol Med* **28**(6): 907-917. DOI:[10.3892/ijmm.2011.777](https://dx.doi.org/10.3892/ijmm.2011.777)

Takeuchi, T., Y. Nakaoka, R. Emura and T. Higashi (2002). "Diamagnetic orientation of bull sperms and related materials in static magnetic fields." *Journal of the Physical Society of Japan* **71**(1): 363-368.

Teodori, L., M. C. Albertini, F. Uguccioni, E. Falcieri, M. B. L. Rocchi, M. Battistelli, C. Coluzza, G. Piantanida, A. Bergamaschi, A. Magrini, R. Mucciato and A. Accorsi (2006). "Static magnetic fields affect cell size, shape, orientation, and membrane surface of human glioblastoma cells, as demonstrated by electron, optic, and atomic force microscopy." *Cytometry Part A* **69A**(2): 75-85. DOI:[10.1002/cyto.a.20208](https://dx.doi.org/10.1002/cyto.a.20208)

Thaiparambil, J. T., C. M. Eggers and A. I. Marcus (2012). "AMPK Regulates Mitotic Spindle Orientation through Phosphorylation of Myosin Regulatory Light Chain." *Molecular and Cellular Biology* **32**(16): 3203-3217. DOI:[10.1128/MCB.00418-12](https://dx.doi.org/10.1128/MCB.00418-12)

Torbet, J. and M. C. Ronziere (1984). "Magnetic alignment of collagen during self-assembly." *Biochem J* **219**(3): 1057-1059.

Toyoshima, F., S. Matsumura, H. Morimoto, M. Mitsushima and E. Nishida (2007). "PtdIns(3,4,5)P3 regulates spindle orientation in adherent cells." *Dev Cell* **13**(6): 796-811. DOI:[10.1016/j.devcel.2007.10.014](https://dx.doi.org/10.1016/j.devcel.2007.10.014)

Toyoshima, F. and E. Nishida (2007). "Integrin-mediated adhesion orients the spindle parallel to the substratum in an EB1-and myosin X-dependent manner." *Embo Journal* **26**(6): 1487-1498. DOI:[10.1038/sj.emboj.7601599](https://dx.doi.org/10.1038/sj.emboj.7601599)

Toyoshima, F. and E. Nishida (2007). "Spindle orientation in animal cell mitosis: Roles of integrin in the control of spindle axis." *Journal of Cellular Physiology* **213**(2): 407-411. DOI:[10.1002/jcp.21227](https://dx.doi.org/10.1002/jcp.21227)

Valiron, O., L. Peris, G. Rikken, A. Schweitzer, Y. Saoudi, C. Remy and D. Job (2005). "Cellular disorders induced by high magnetic fields." *Journal of Magnetic Resonance Imaging* **22**(3): 334-340. DOI:[10.1002/jmri.20398](https://dx.doi.org/10.1002/jmri.20398)

Valles, J. M. (2002). "Model of magnetic field-induced mitotic apparatus reorientation in frog eggs." *Biophysical Journal* **82**(3): 1260-1265. DOI:[10.1016/S0006-3495(02)75482-9](https://dx.doi.org/10.1016/S0006-3495(02)75482-9)

Vassilev, L. T. (2006). "Cell cycle synchronization at the G2/M phase border by reversible inhibition of CDK1." *Cell Cycle* **5**(22): 2555-2556. DOI:[10.4161/cc.5.22.3463](https://dx.doi.org/10.4161/cc.5.22.3463)

Vassilev, L. T., C. Tovar, S. Chen, D. Knezevic, X. Zhao, H. Sun, D. C. Heimbrook and L. Chen (2006). "Selective small-molecule inhibitor reveals critical mitotic functions of human CDK1." *Proc Natl Acad Sci U S A* **103**(28): 10660-10665. DOI:[10.1073/pnas.0600447103](https://dx.doi.org/10.1073/pnas.0600447103)

Vassilev, P. M., R. T. Dronzine, M. P. Vassileva and G. A. Georgiev (1982). "Parallel Arrays of Microtubules Formed in Electric and Magnetic-Fields." *Bioscience Reports* **2**(12): 1025-1029.

Wang, D. L., X. S. Wang, R. Xiao, Y. Liu and R. Q. He (2008). "Tubulin assembly is disordered in a hypogeomagnetic field." *Biochemical and Biophysical Research Communications* **376**(2): 363-368. DOI:[10.1016/j.bbrc.2008.08.156](https://dx.doi.org/10.1016/j.bbrc.2008.08.156)

Woolner, S., L. L. O'Brien, C. Wiese and W. M. Bement (2008). "Myosin-10 and actin filaments are essential for mitotic spindle function." *Journal of Cell Biology* **182**(1): 77-88. DOI:[10.1083/jcb.200804062](https://dx.doi.org/10.1083/jcb.200804062)

Worcester, D. L. (1978). "Structural Origins of Diamagnetic Anisotropy in Proteins." *Proceedings of the National Academy of Sciences of the United States of America* **75**(11): 5475-5477.

Zhang, L., J. H. Wang, H. L. Wang, W. C. Wang, Z. Y. Li, J. J. Liu, X. X. Yang, X. M. Ji, Y. Luo, C. Hu, Y. B. Hou, Q. Q. He, J. Fang, J. F. Wang, Q. S. Liu, G. H. Li, Q. Y. Lu and X. Zhang (2016). "Moderate and strong static magnetic fields directly affect EGFR kinase domain orientation to inhibit cancer cell proliferation." *Oncotarget* **7**(27): 41527-41539.

Zhao, G. P., S. P. Chen, Y. Zhao, L. Y. Zhu, P. Huang, L. Z. Bao, J. Wang, L. Wang, L. J. Wu, Y. J. Wu and A. Xu (2010). "Effects of 13 T Static Magnetic Fields (SMF) in the Cell Cycle Distribution and Cell Viability in Immortalized Hamster Cells and Human Primary Fibroblasts Cells." *Plasma Science & Technology* **12**(1): 123-128.

Zhao, Y. and Q. M. Zhan (2012). "Electric fields generated by synchronized oscillations of microtubules, centrosomes and chromosomes regulate the dynamics of mitosis and meiosis." *Theoretical Biology and Medical Modelling* **9**: DOI: 10.1186/1742-4682-1189-1126. DOI:[10.1186/1742-4682-9-26](https://dx.doi.org/10.1186/1742-4682-9-26)

**Figures**

**Figure 1. 27 T ultra-high water-cooled magnet and the biological sample incubation system. (A)** The WM4 (water-cooled magnet#4 in the Chinese High Magnetic Field Lab). **(B, C)** The design and picture of the biological sample incubation system. Two identical sets were made. One was used in the magnet while the other was placed outside of the magnet to serve as the “sham” control. **(D)** The top view of the magnet, where the biological sample incubation tube was inserted. **(E)** The magnetic field was maintained at 27 T (total of 4 hours, 3 hours stable maintenance at 27 T with half hour increase and half hour decrease).

**Figure 1-figure supplement 1. The design and actual picture of the 18 mm custom made cell culture plate.** (A) The design of the 18 mm plate. (B) The picture of the cell culture plates of different sizes. 100 mm, 60 mm and 35 mm plates were placed side-by-side in the bottom picture for size comparison. The smallest plate in the picture was the custom made 18 mm cell plate.

**Figure 2. 27 T Ultra-high magnetic field does not have immediate cytotoxicity effects in CNE-2Z cells.** CNE-2Z cells were plated directly on 18 mm tissue culture plate or coverslips in the18 mm tissue culture plate one night ahead to allow the cells to attach. On the day of experiment, they were placed in regular full-sized cell incubator (control) or the sample incubators in sham or in 27T magnet for 4 hours before they were taken out and subjected to the following analysis. **(A)** Representative bright field images and of control, sham and 27 T SMF treated CNE-2Z cells. Scale bar: 20 m. **(B)** Quantification of cell numbers in control, sham and 27 T SMF treated CNE-2Z cells from three independent experiments (n=3). Data is mean ± SD. “ns”, not significant. **(C)** Flow cytometry results of CNE-2Z cells treated with control, sham or 27 T for 4 hours and dual staining with annexin V and PI. Bottom left leaflet shows the live cells that have intact cell membrane and have negative staining for both dyes. Top left leaflet shows necrotic cells. Right parts show apoptotic cells. **(D)** Quantification of cell numbers in each population. **(E)** Immunofluorescence of CNE-2Z cells shows that 27 T SMF does not have obvious effects on microtubule and actin cytoskeleton in interphase cells. CNE-2Z cells were fixed and stained with anti-tubulin antibody and fluorescently labeled phalloidin for microtubules (green) and actin (red) cytoskeleton. Experiments have been repeated for three times and representative images are shown in the figure. Scale bar: 10 m.

**Figure 2-figure supplement 1. 27 T SMF reduced CNE-2Z cell number three days post-exposure.** CNE-2Z cells were plated one night ahead to allow the cells to attach, exposed to 27 T SMF for 4 hours before they were taken out and returned back to the regular full sized cell incubator for another 3 days before they were subjected to the following analysis. **(A)** Representative bright field images and of control, sham and 27T SMF treated CNE-2Z cells. **(B)** Quantification of cell numbers in control, sham and 27 T SMF treated CNE-2Z cells from three independent experiments (n=3). Data is mean ± SD. *. p < 0.05. **(C)** Flow cytometry cell cycle analysis shows the cell distribution in each cell cycle. **(D)** Flow cytometry results of CNE-2Z cells treated with control, sham or 27T for 4 hours and dual staining with annexin V and PI for cell death. Quantification of cell numbers in each cell population from three independent experiments (n=3). Data is mean ± SD.

**Figure 3. 27 T SMF changed spindle orientation.** CNE-2Z cells were plated on coverslips in the 18 mm tissue culture plate one night ahead to allow the cells to attach. On the day of experiment, they were placed in regular full-sized cell incubator (control) or the sample incubators in sham or in 27 T magnet for 4 hours before they were taken out, fixed and stained with anti-tubulin antibody (for microtubules), phalloidin (for F-actin). **(A)** Representative immunofluorescence images of CNE-2Z cells show that 27 T SMF changes spindle orientation. Multistack images were taken and individual vertical image planes (Z) were displayed to show the spindle orientation. Microtubules are shown in green and F-actin filaments are shown in red. One cell in sham and two cells in 27 T SMF treated group are shown. **(B)** Illustration of spindles with different orientations. “B” shows the magnetic field direction and “g” shows the gravity direction. **(C)** Quantification of spindle orientations in control, sham or 27 T treated cells from four independent experiments (n=4). Data is presented as mean ± SD.*, p < 0.05; **, p < 0.01. Total of 921 metaphase spindles were counted.

**Figure 3-figure supplement 1. Spindle orientation in prometaphase and metaphase CNE-2Z cells were changed by 27 T SMF.** Quantification of spindle orientations in control, sham or 27 T treated cells from four independent experiments (n=4). Data is presented as mean ± SD. Both prometaphase and metaphase cells were quantified. Total of 1447 spindles were measured. **. p < 0.01.

**Figure 4. SMFs affected spindle orientation in a field intensity dependent manner.** CNE-2Z cells were plated on coverslips in the 35 mm or 24 well tissue culture plate one night ahead to allow the cells to attach. On the day of experiment, they were exposed to different intensity SMFs for different time before they were taken out, fixed and stained with anti-tubulin antibody (for microtubules) and DAPI (for DNA). **(A)** 0.05 T and 1 T moderate intensity SMF exposure experimental set-up. Permanent magnets were placed inside a regular full-sized cell incubator to ensure proper culture conditions. Cell culture plate was placed on the top surface center of the magnet. **(B-F)** Quantification of spindle orientations in control, 0.05 T, 1 T or 9 T treated cells. Total of 200-300 metaphase spindles from 3-4 independent coverslips were examined for each condition. Data is presented as mean ± SD. ; *, p < 0.05.

**Figure 5. Prometaphase and metaphase spindles have different orientations in 27 T SMFs. (A-C)** Schematic illustration of the experimental set-up. **(A)** CNE-2Z and RPE1 cells were plated on pre-cut coverslips one night ahead to allow the cells to attach. **(B)** On the day of experiment, the coverslips were inserted onto agrose gel in the 18 mm plates. **(C)** Cells were treated with or without synchronization, and with or without 27 T magnetic field for 4 hours before they were fixed and stained with anti-tubulin antibody (for microtubules) and fluorescently labeled phalloidin (for actin polymer) and DAPI (for DNA). “B” shows the magnetic field direction and “g” shows the gravity direction. **(D)** The orientation of the spindle long axis was measured and characterized into “parallel” (green), “normal” (blue) and “others” (grey) according to the angle between spindle long axis and the magnetic field direction. **(E)** Representative immunofluorescence images of prometaphase and metaphase RPE1 cells that have different orientation when they were exposed to 27 T SMF for 4 hours. Scale bar: 10 m. **(F, G)** Quantification of prometaphase and metaphase spindle orientations in control, sham or 27 T treated CNE-2Z (F), and RPE1 (G) cells. One experiment was done in synchronized cells and the other was done with unsynchronized. Total of 1575 spindles were measured from four independent coverslips from two independent experiments. The histograms were created in excel (mean ± SD). Scatter plots were created in GraphPad (mean ± SEM). *. p < 0.05, **. p < 0.01, ***. p <0.005.

**Figure 5-figure supplement 1. Synchronization procedure to enrich mitotic cells and spindle orientation measurement. (A)** Schematic illustration of the experimental procedure. **(B)** Representative immunofluorescence images of CNE-2Z and RPE1 cells show that 27 T SMF changes spindle orientation. Spindles with different orientations were labeled by boxes with different colors. Orange indicates parallel to the field direction; Red indicates normal to the field directions; Gray indicates others that are not parallel or vertical to the field direction.Scale bar: 10 m. **(C)** The angle between spindles and the magnetic field direction was measured. The angles were measured by drawing a line between the two spindle poles and a line for the field direction.

**Figure 5-figure supplement 2. Prometaphase and metaphase cells show different orientation in both synchronized and unsynchronized CNE-2Z and RPE1 cells after 27 T SMF exposure for 4 h.** Quantification of prometaphase and metaphase spindle orientations in 27 T treated CNE-2Z (A) and RPE1 (B) cells from four independent coverslips from an unsynchronized or synchronized experiment. One dot represents one spindle. Data is mean ± SEM. ***, p<0.005.

**Figure 5-figure supplement 3. Cosinus of angles between spindle long axis and the 27 T magnetic field direction.** The calculation was based on figure 5 F and G.

**Figure 6. Chromosome alignment affects spindle orientation.** CNE-2Z and RPE1 cells were treated with RO-3306 and the CENP-E inhibitor (GSK923295) before they were exposed to 27 T SMF for 4 hours. Cells were then harvested for Immunofluorescence experiment. **(A)** Schematic illustration of the experimental procedure. **(B)** Representative immunofluorescence images show that CNE-2Z cells with misaligned chromosomes prefer to align with their spindle long axis in parallel with the magnetic field direction (upward) but the cells with well aligned chromosomes prefer to align their chromosome plate in parallel, with the spindle long axis normal to, the magnetic field direction. Scale bar: 10 m. **(C)** Schematic illustration of the spindle and chromosome measurement. “a” is the spindle length, defined as the distance between two spindle poles. “b” is the chromosome distribution, defined by the maximum distance between chromosomes along the spindle long axis. “c” is the metaphase plate width. Measurements were done in Adobe Photoshop. **(D)** The 27 T SMF affects the angle between spindle long axis with magnetic field direction in CNE-2Z and RPE1 cells, which is determined by chromosome distribution.Sham and 27 T groups are shown in the figure. Control groups are shown in the figure supplement due to space limitation. **(E, F)** Quantification of the angle between spindle long axis with the magnetic field direction in CNE-2Z (E) or RPE1 (F) cells in control, sham control or 27 T SMF treated group to compare the difference between spindles with misaligned vs. aligned chromosomes. “Misaligned chromosomes” were defined as c/b<1.5 (CNE-2Z cells) or 1.8 (RPE1 cells) and “Aligned chromosomes” were defined as c/b>1.5 (CNE-2Z cells) or 1.8 (RPE1 cells). Quantifications for D-F were from total of 618 CNE-2Z spindles and 452 RPE1 spindles. Spindles for each cell type were from four independent coverslips in two independent days. Data is mean ± SEM. “ns”, not significant; *, p < 0.05; **, p < 0.01. **(G)** Cartoon illustrates that spindles with misaligned chromosomes tend to align along the magnetic field direction (B, upward) while spindles with compact metaphase plate tend to align normal to the field direction.

**Figure 6-figure supplement 1. The chromosome distribution and angle between spindle long axis and the magnetic field/gravity direction in control CNE-2Z and RPE1 cells.** These are the control groups of figure 6D.

**Figure 6-figure supplement 2. SMFs of 1 T and 9 T did not affect spindle orientation in CNE-2Z cells.** Similar to Figure 6, “a” is the spindle length, defined as the distance between two spindle poles. “b” is the chromosome distribution, defined by the maximum distance between chromosomes along the spindle long axis. a/b value reflects the chromosome distribution within the spindle. (A) The angle between spindle long axis with the magnetic field direction was not affected by 1 T and 9 T SMFs or the chromosome distribution within the spindle; (B) The angle between spindle long axis with the magnetic field direction was not affected by chromosome alignment 1 T and 9 T SMFs. Quantifications were from total of 466 CNE-2Z spindles from four independent coverslips in two independent days. Data is mean ± SEM. “ns”, not significant.

**Figure 7. 27 T SMF changes spindle morphology in both CNE-2Z and RPE1 cells. (A)** Representative immunofluorescence images of CNE-2Z and RPE1 cells with or without 27 T SMF treatment for 4 hours. Scale bar: 5 m. **(B)** Illustration of the pole angle measurement of the metaphase spindles inCNE-2Z and RPE1 cells with or without 27 T SMF treatment for 4 hours. “1” measures the pole angle of metaphase spindles in parallel to the magnetic field/gravity direction (green) and “2” measures the pole angle of metaphase spindles normal to the magnetic field/gravity direction (blue). Scale bar: 5 m. **(C)** Quantification of the metaphase spindle poleangle measurement for synchronized CNE-2Z and RPE1 cells with or without 27 T SMF. RO-3306 and MG132 synchronization was used to increase the percentage of mitotic cells. Total of 295 metaphase spindles were measured from four independent coverslips. Data is mean ± SEM. **(D)** Quantification of thespindle width for RO-3306 and CENP-E inhibitor treated CNE-2Z and RPE1 cells. Experimental procedure was as shown in Fig.5A. Sham and 27 T treated groups are shown here and the control groups are shown in figure supplement 2C, D. **(E)** Illustration of the spindle and chromosome measurement. **(F)** Quantification of the relationship between spindle morphology and chromosome alignment in CENP-E inhibitor treated CNE-2Z cells that have spindle axis normal to the magnetic field/gravity direction (angle of 80-90 degree). Misaligned chromosomes (black) vs. aligned chromosomes (red) were classified by different c/b ratio values. Measurement was done on spindles from four independent coverslips from two independent experiments. Data is mean ± SEM. “ns”, not significant; *. p < 0.05; ***, p <0.005.

**Figure 7-figure supplement 1. Quantification of the spindle pole angle measurement in unsynchronized CNE-2Z and RPE1 cells.** Green dots represent spindles that are in parallel to the field direction. Blue dots represent spindles that are normal to the field direction. Total of 166 metaphase spindles were measured from four independent coverslips. Data is mean ± SEM. “ns”, not significant; *, p < 0.05; ***, p < 0.005.

**Figure 7-figure supplement 2. Spindle length was not affected by 27 T SMF when spindle axis was normal to the field direction.** Spindle length and width, as well as their orientation were measured in CNE-2Z and RPE1 cells. **(A, B)** Spindle length of control, sham or 27 T treated CNE-2Z (A) and RPE1 (B) cells. **(C, D)** Spindle width in control CNE-2Z (C) and RPE1 (D) cells.

**Figure 8. Models show that ultra-high SMFs align microtubules and chromosomes to change spindle orientation and morphology.** Blue upward arrows show magnetic field direction. Cells were plated on coverslips, which were placed in the ultra-high magnetic field either normal to or in parallel with the field direction.
